# Supplementary material for: Transcriptome-wide N6-methyladenosine methylome profiling of Bombyx mori reveals a potential mechanism of epigenetic regulation on diapause
Source: Research Square preprint supplement (doi:10.21203/rs.3.rs-1561012/v1), 2022-04-18

## 目录

|               |    |
|---------------|----|
| IP-QFHT-1.new | 1  |
| IP-QFHT-1.old | 2  |
| IP-QFHT-2.new | 3  |
| IP-QFHT-2.old | 4  |
| IP-QFHT-3.new | 5  |
| IP-QFHT-3.old | 6  |
| IP-QFLT-1.new | 7  |
| IP-QFLT-1.old | 8  |
| IP-QFLT-2.new | 9  |
| IP-QFLT-2.old | 10 |
| IP-QFLT-3.new | 11 |
| IP-QFLT-3.old | 12 |
| IN-QFHT-1.new | 13 |
| IN-QFHT-1.old | 14 |
| IN-QFHT-2.new | 15 |
| IN-QFHT-2.old | 16 |
| IN-QFHT-3.new | 17 |
| IN-QFHT-3.old | 18 |
| IN-QFLT-1.new | 19 |
| IN-QFLT-1.old | 20 |
| IN-QFLT-2.new | 21 |
| IN-QFLT-2.old | 22 |
| IN-QFLT-3.new | 23 |
| IN-QFLT-3.old | 24 |

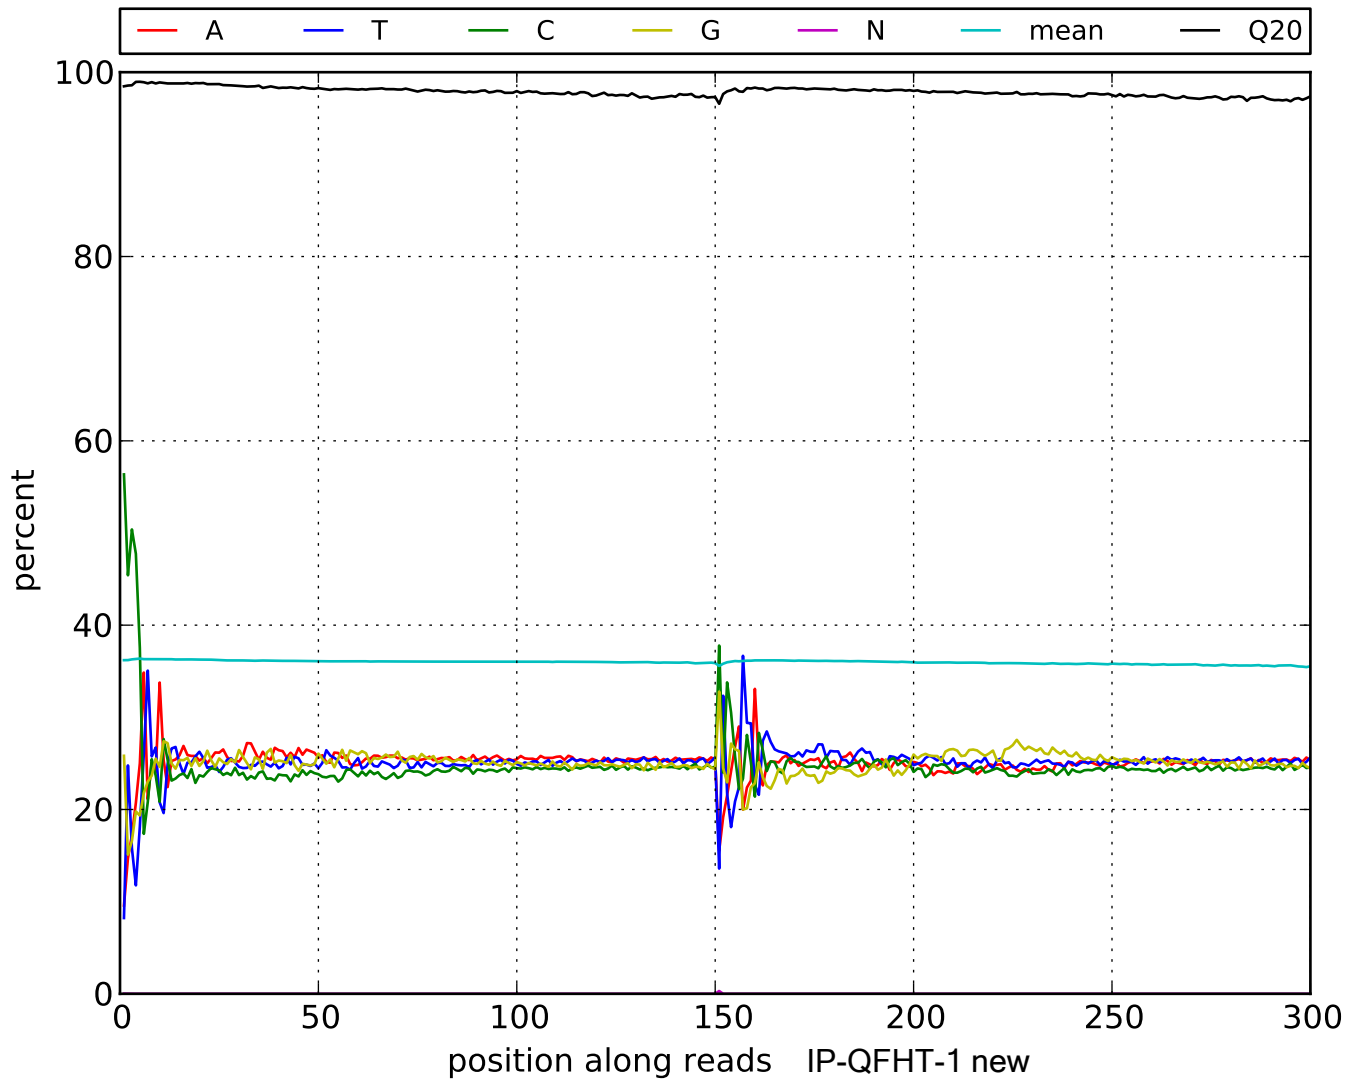

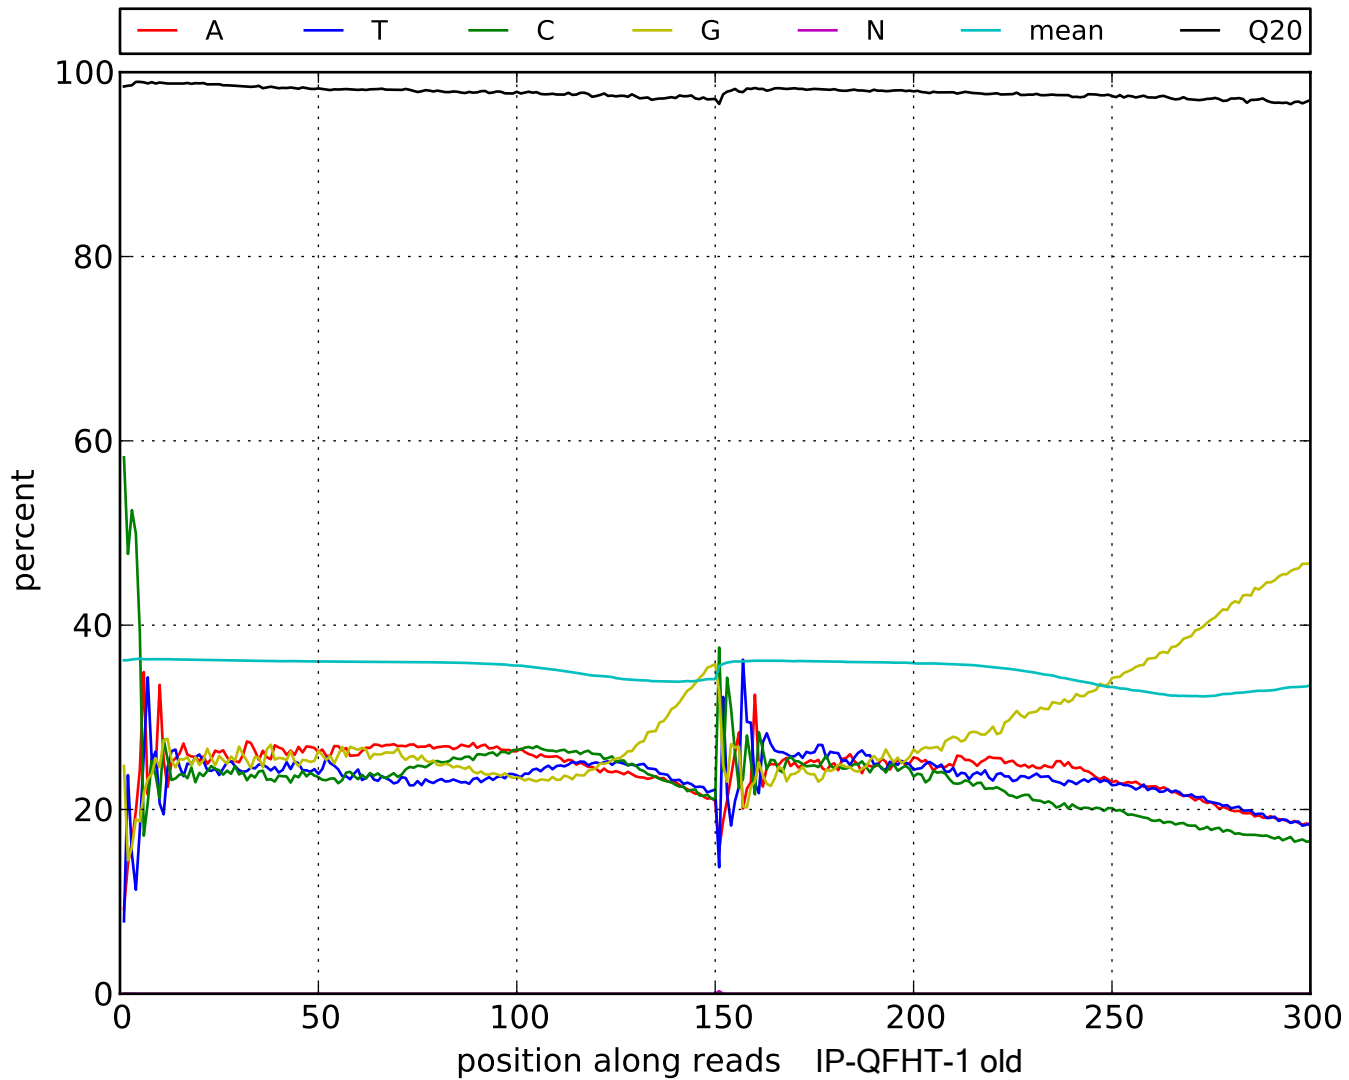

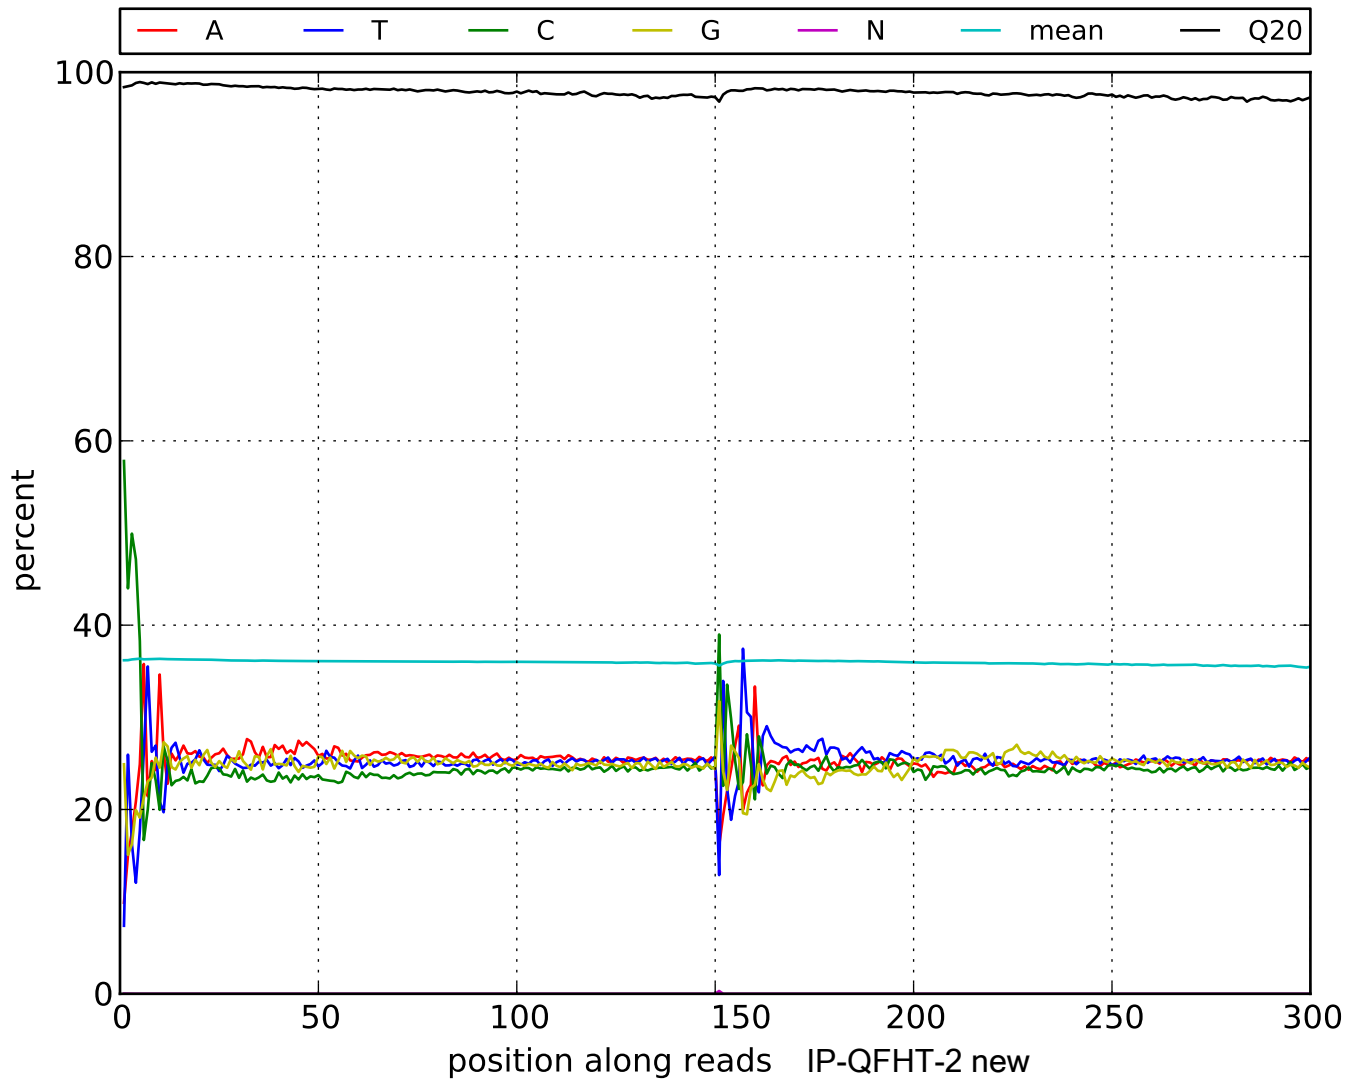

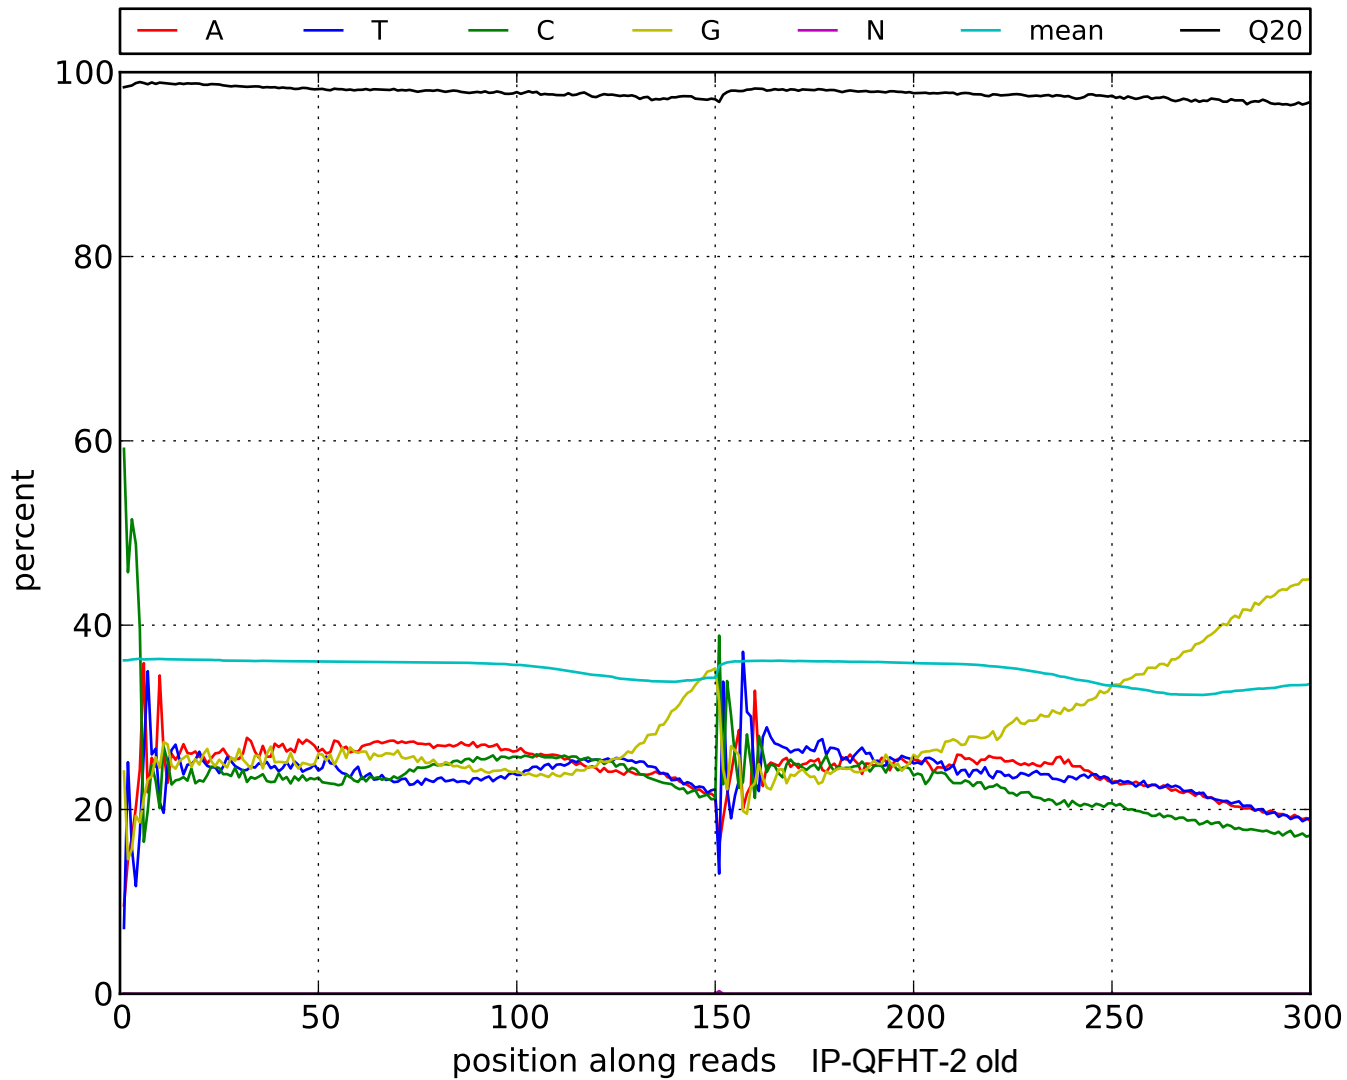

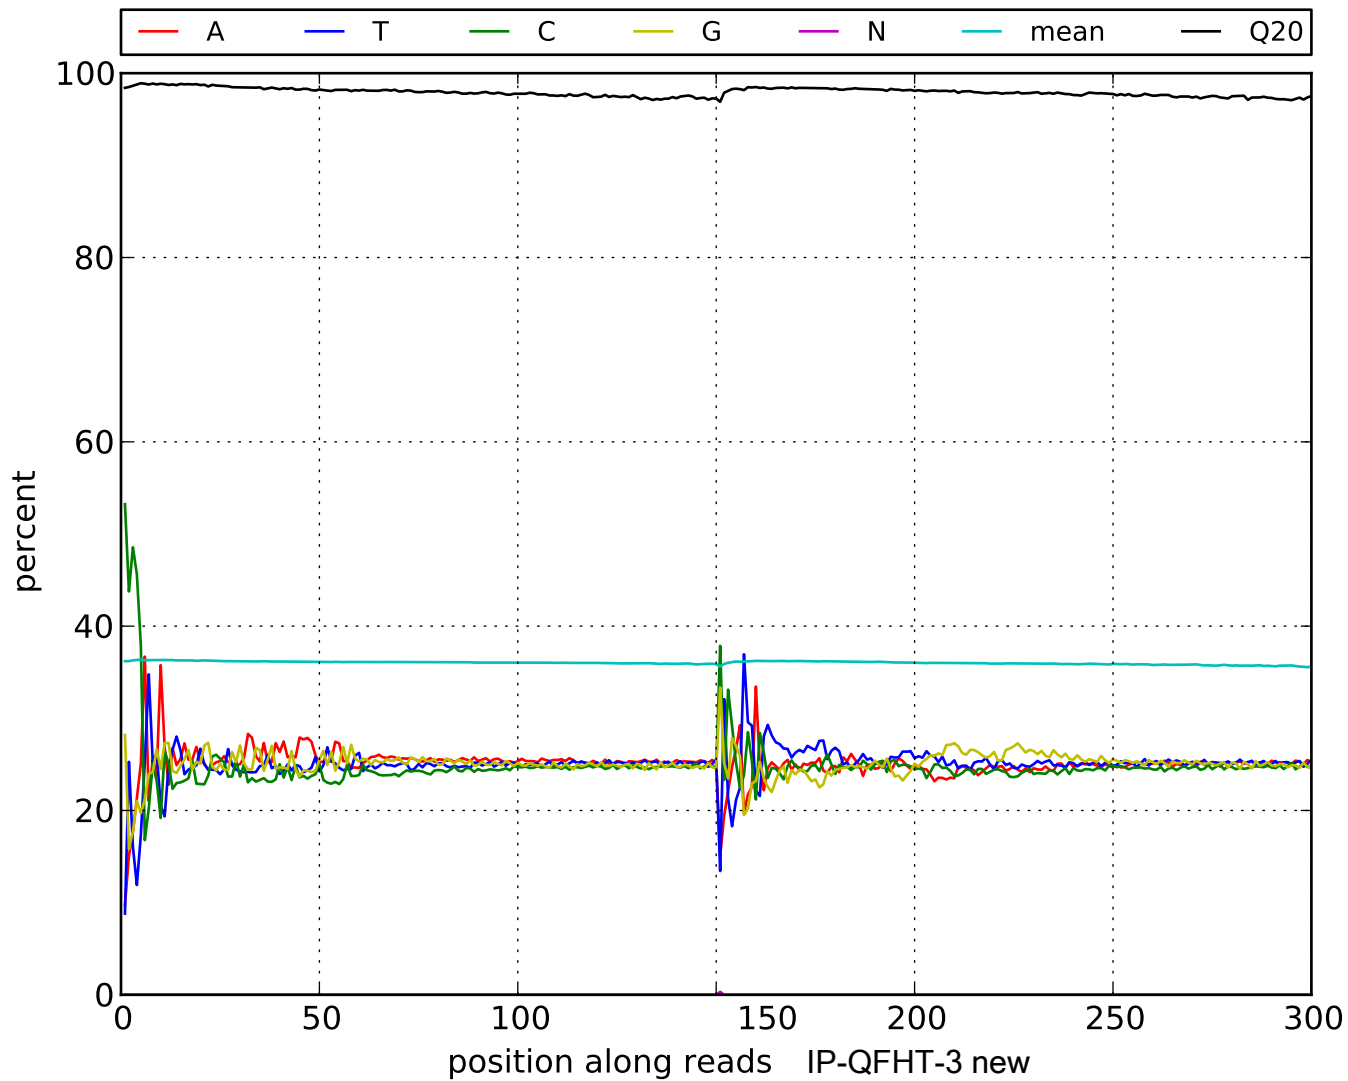

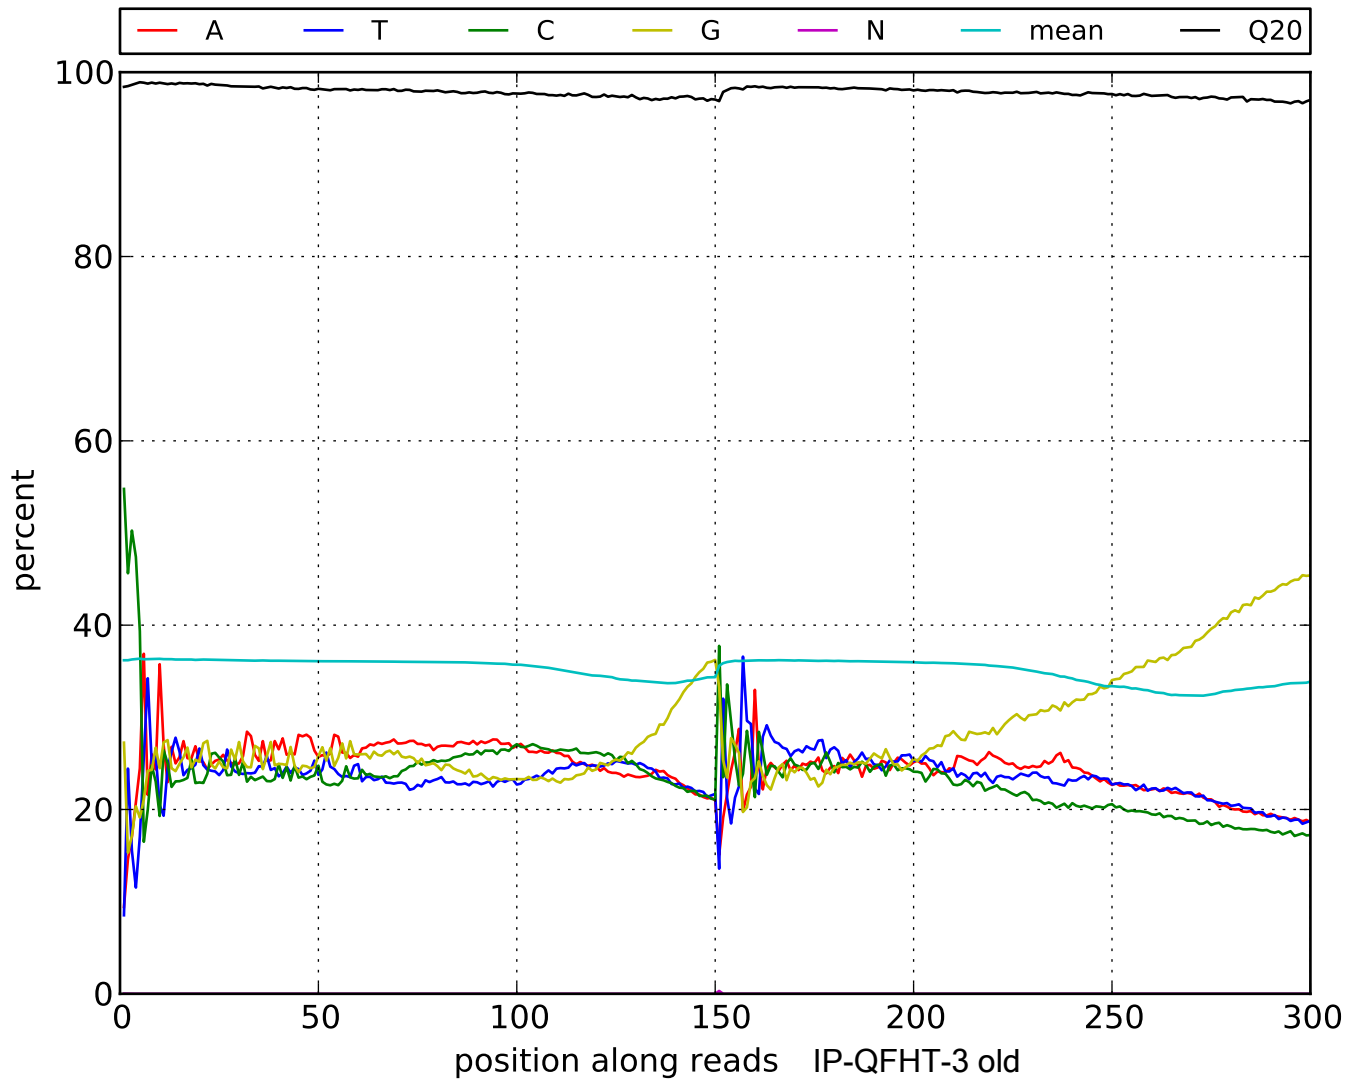

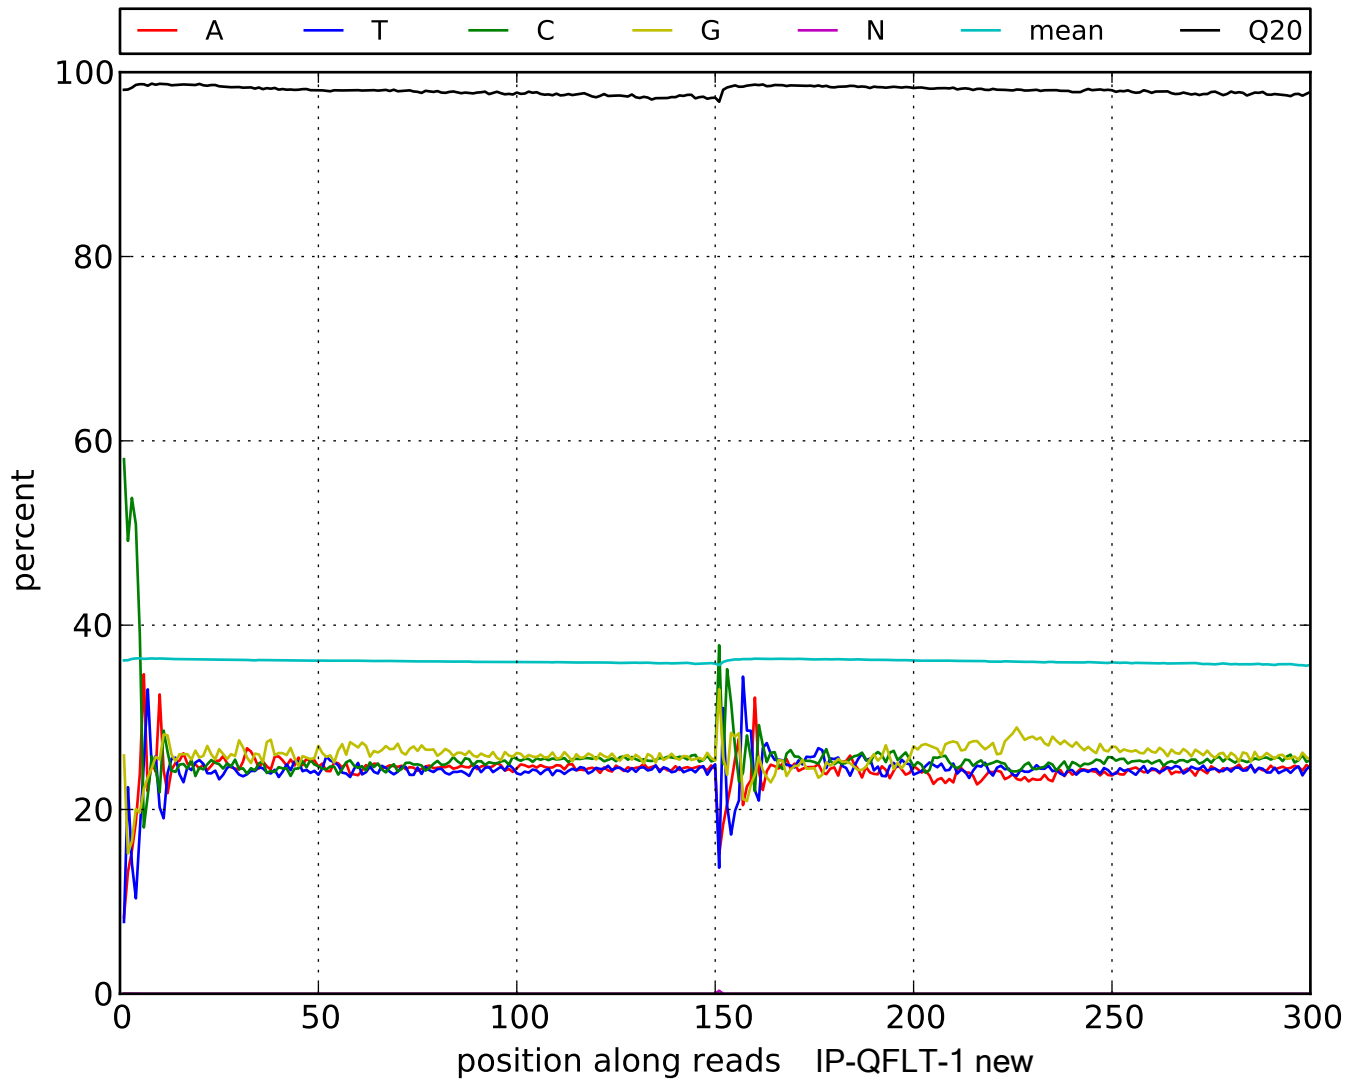

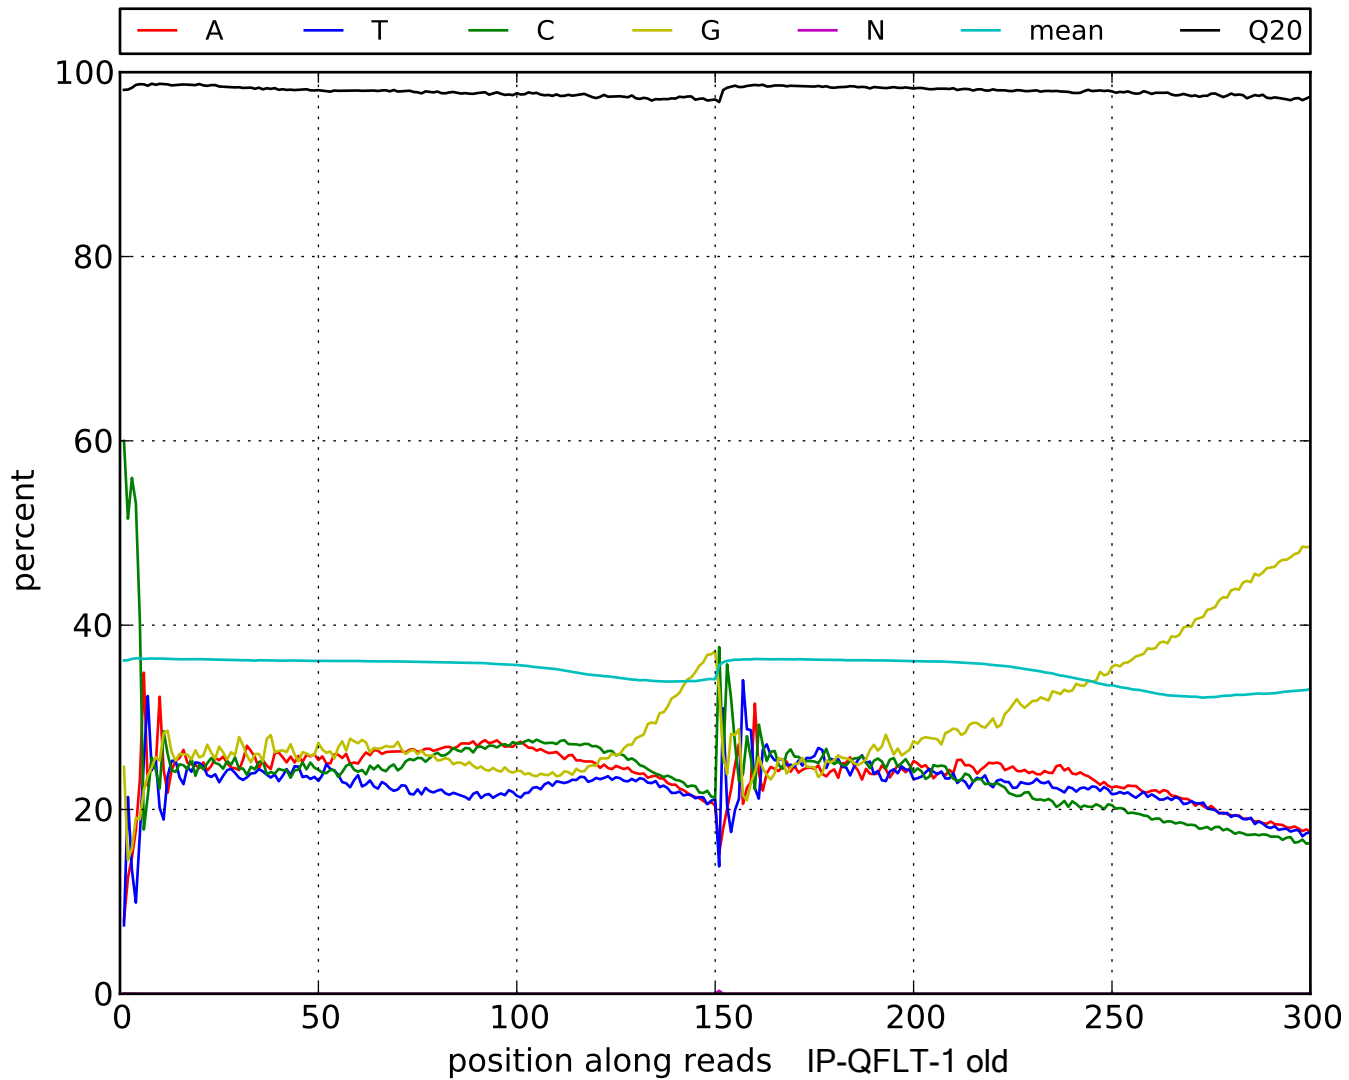

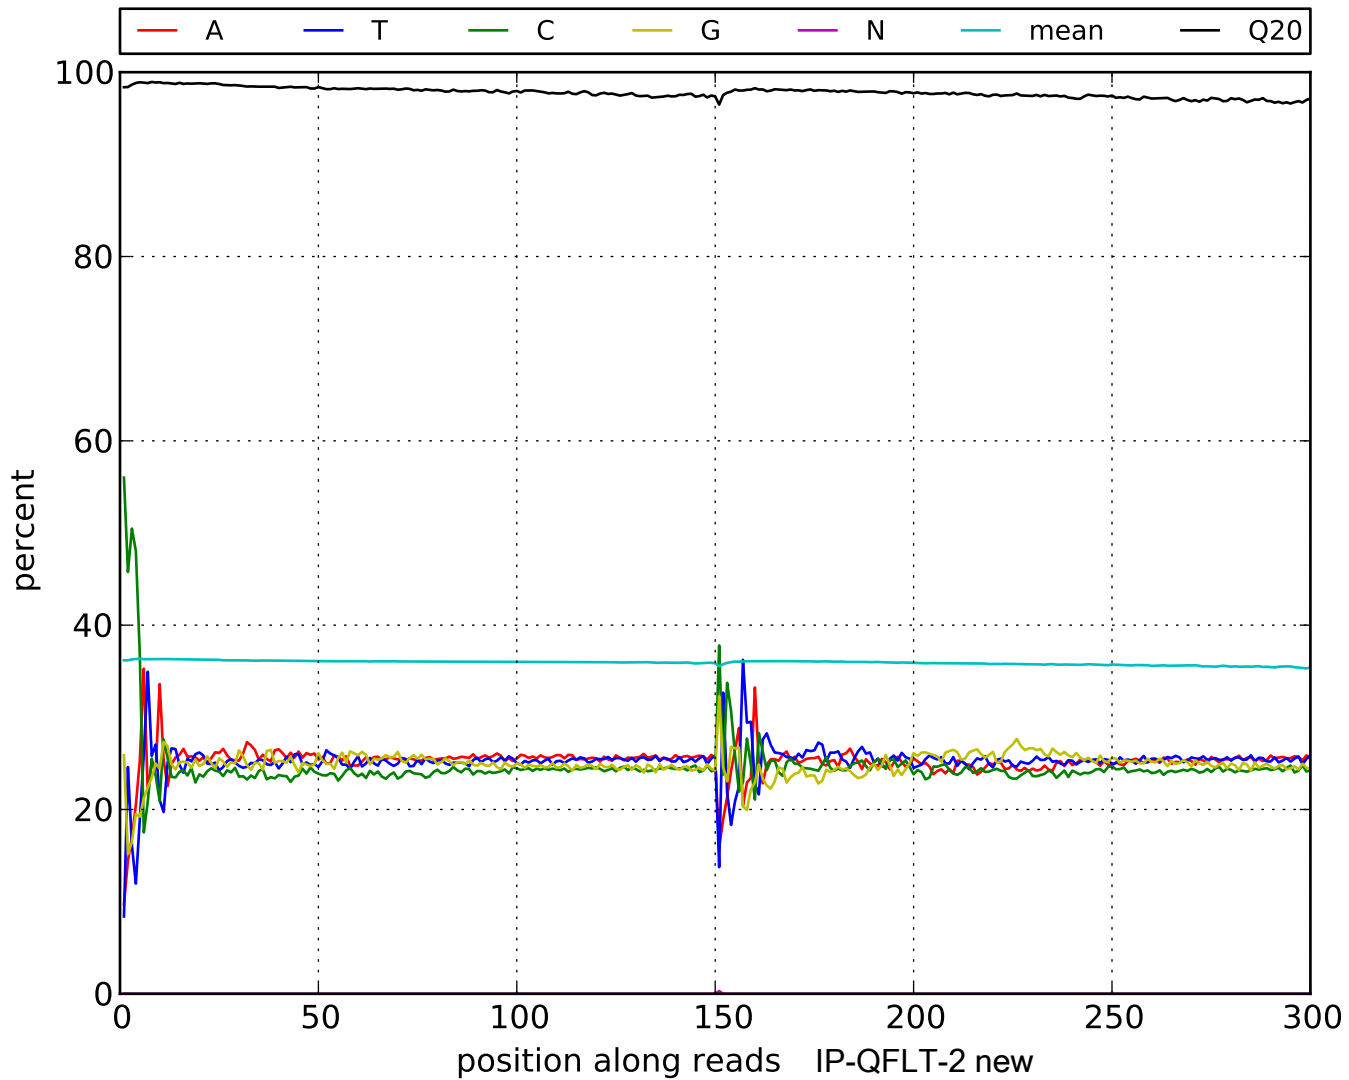

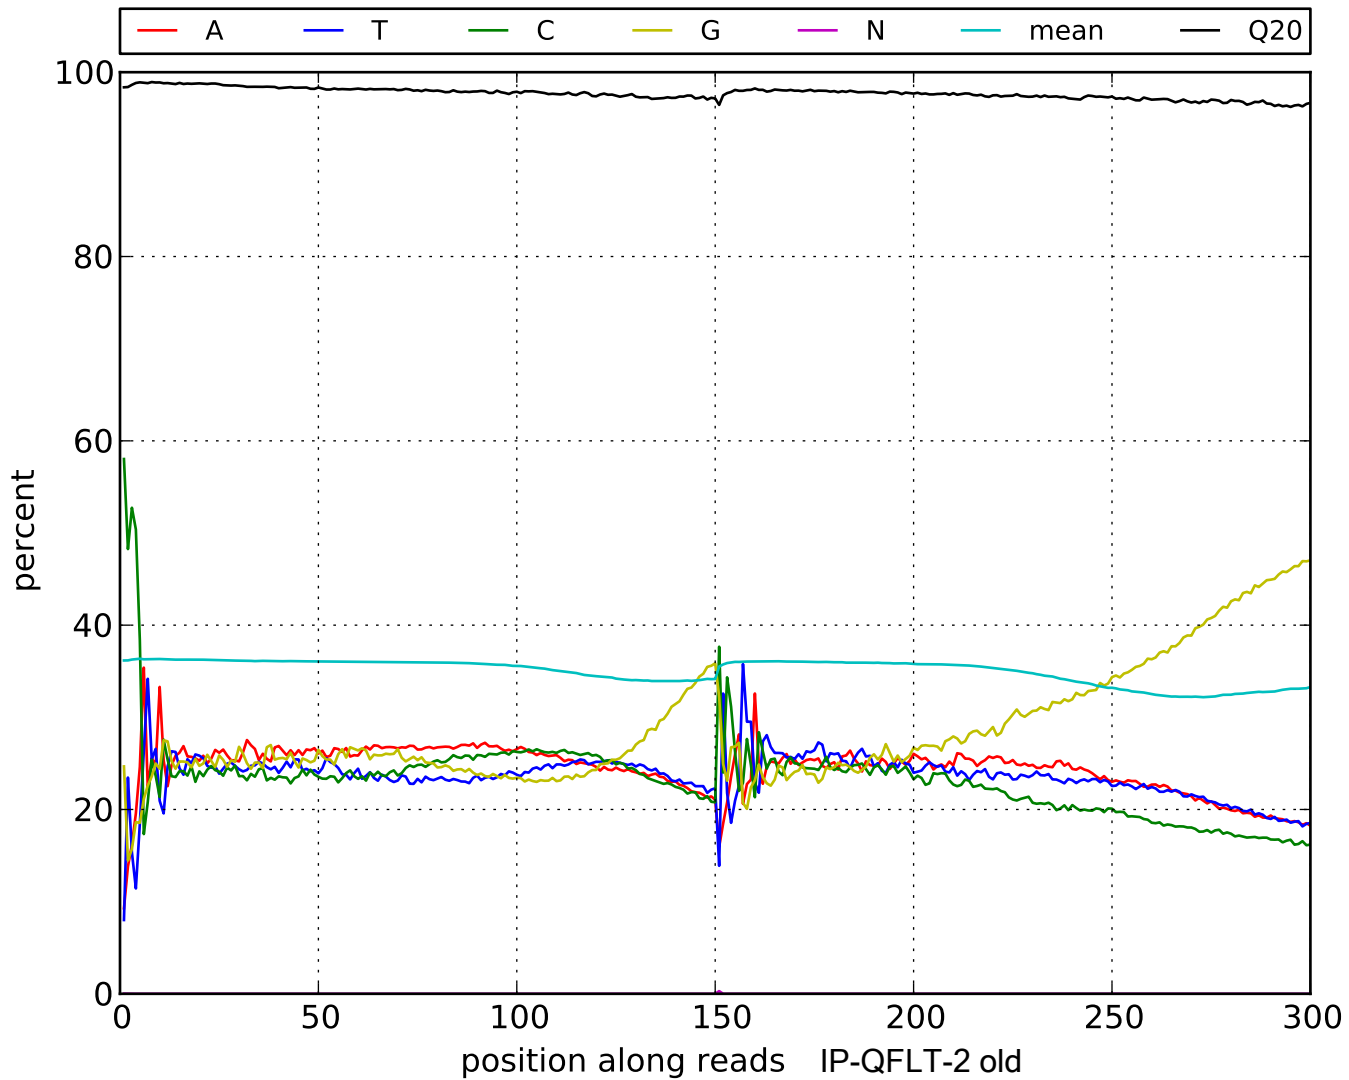

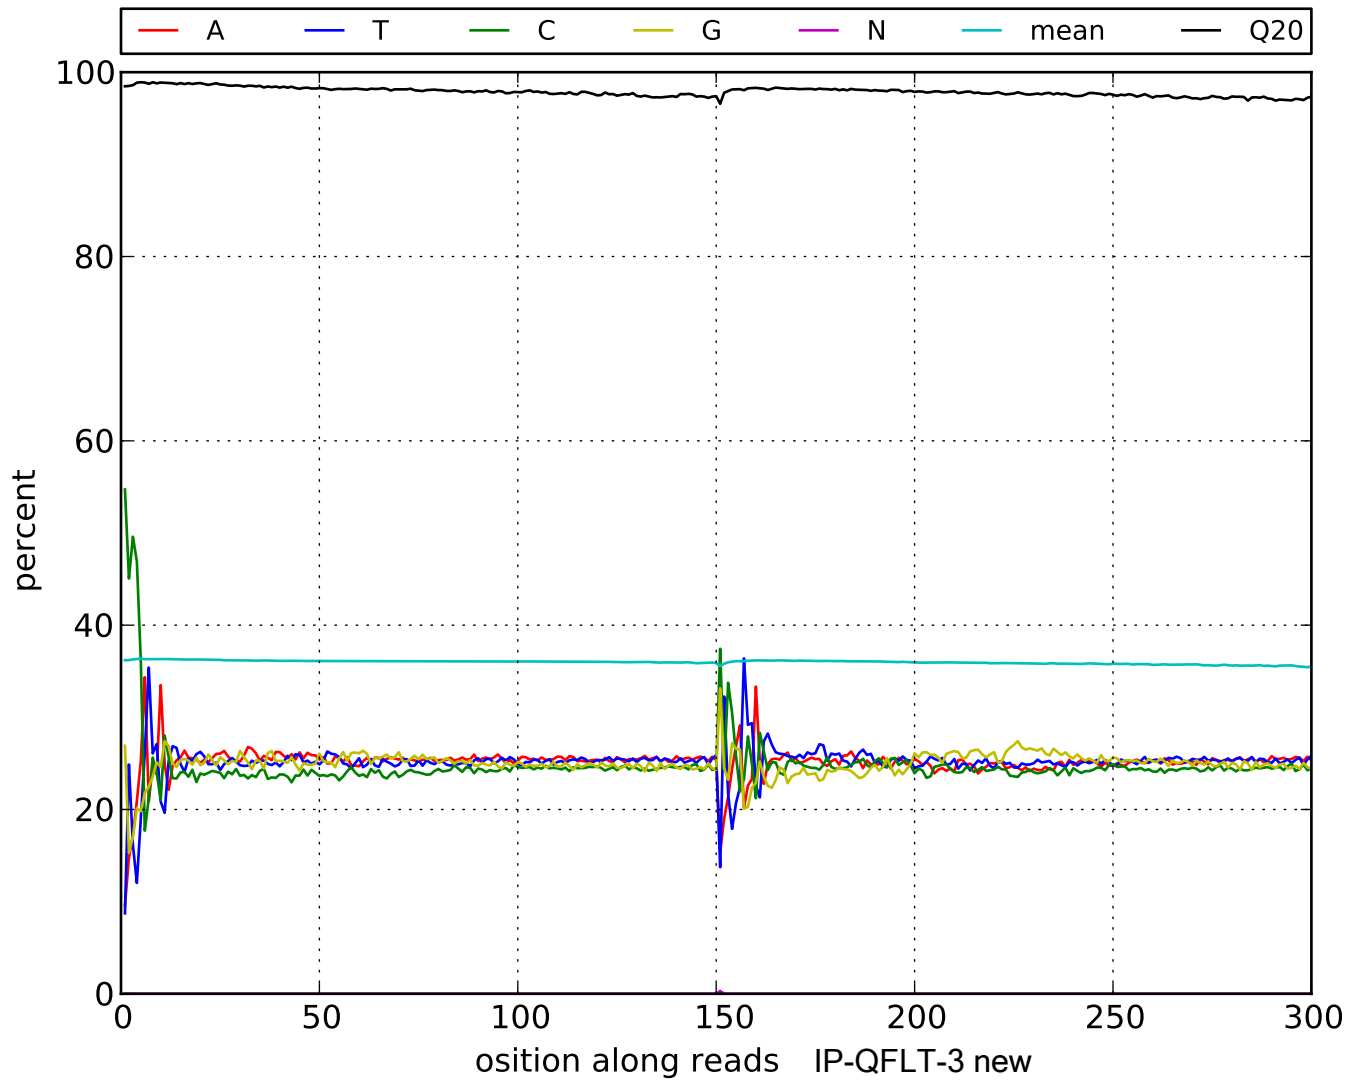

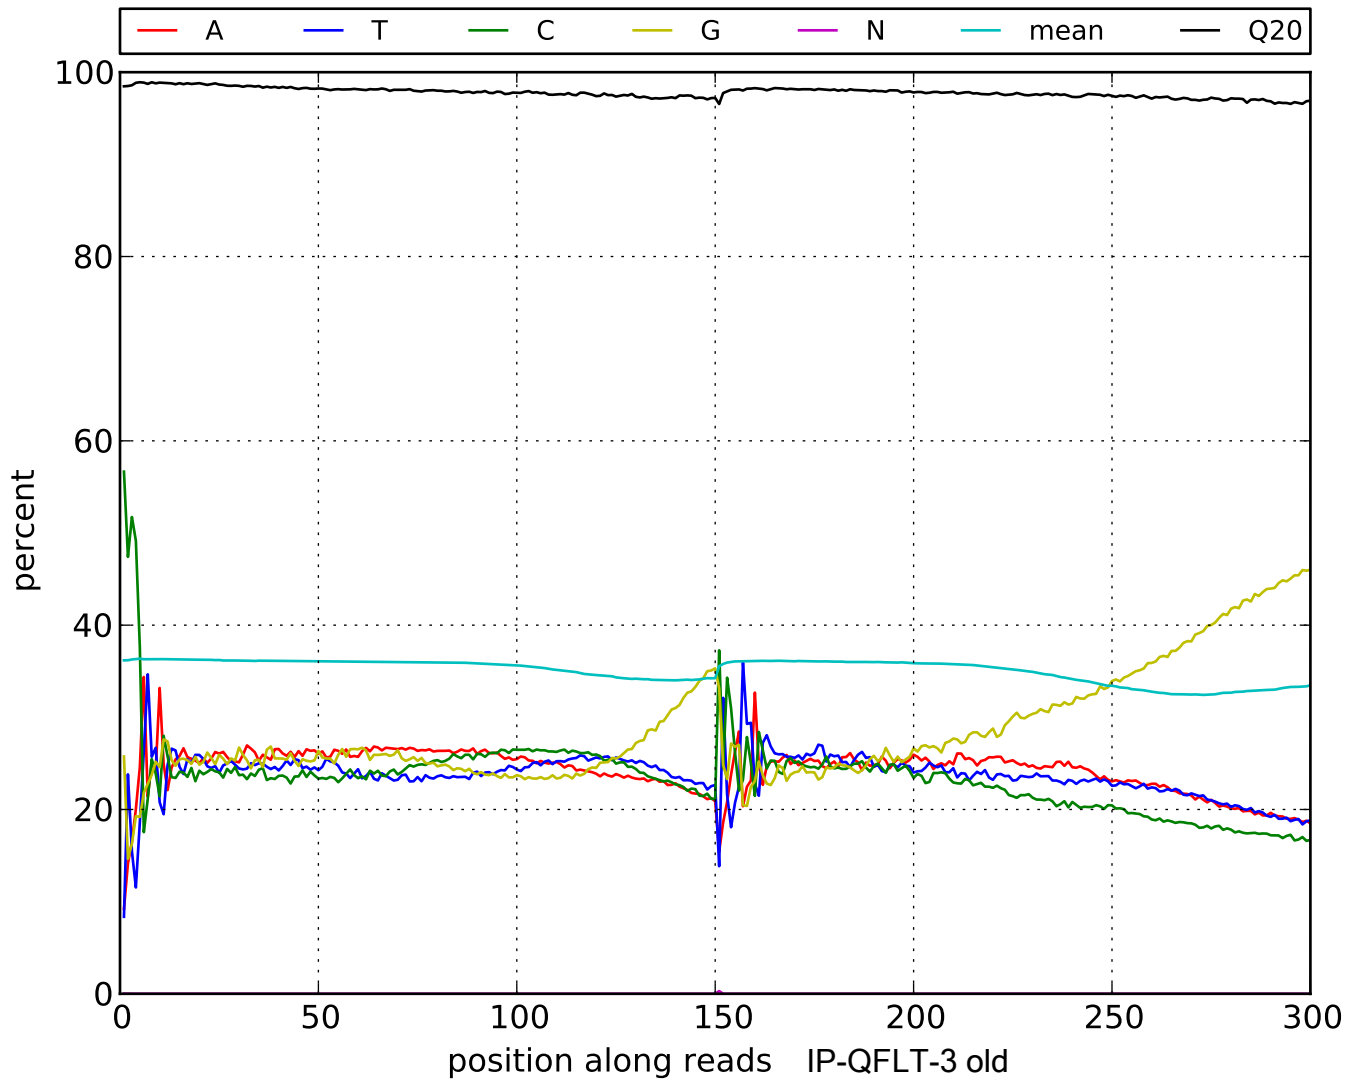

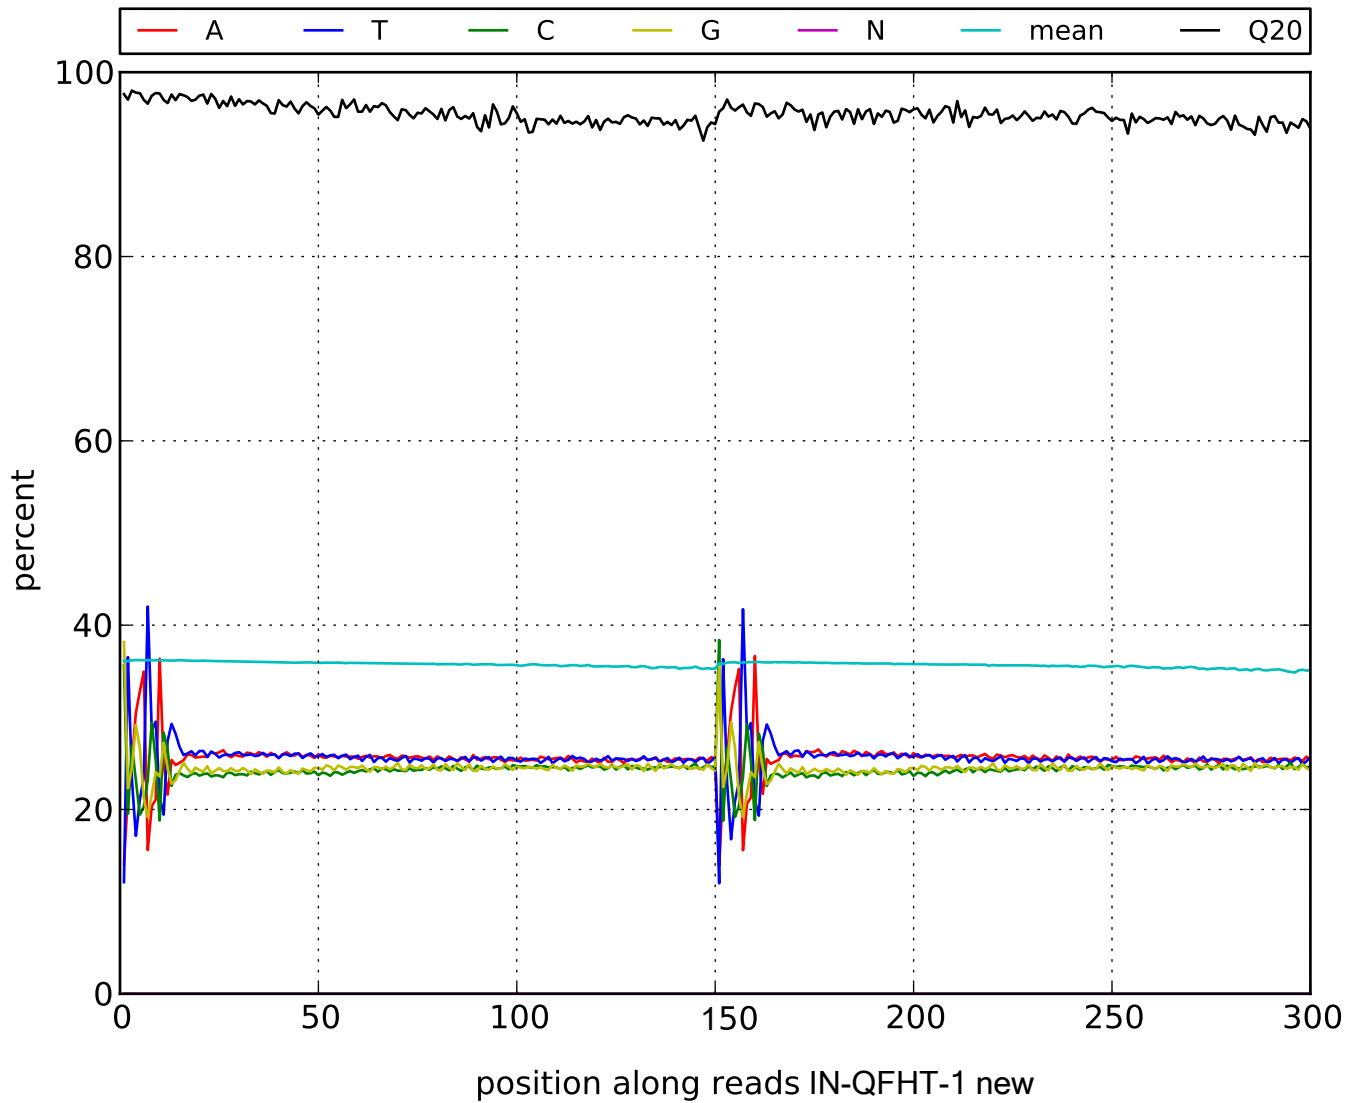

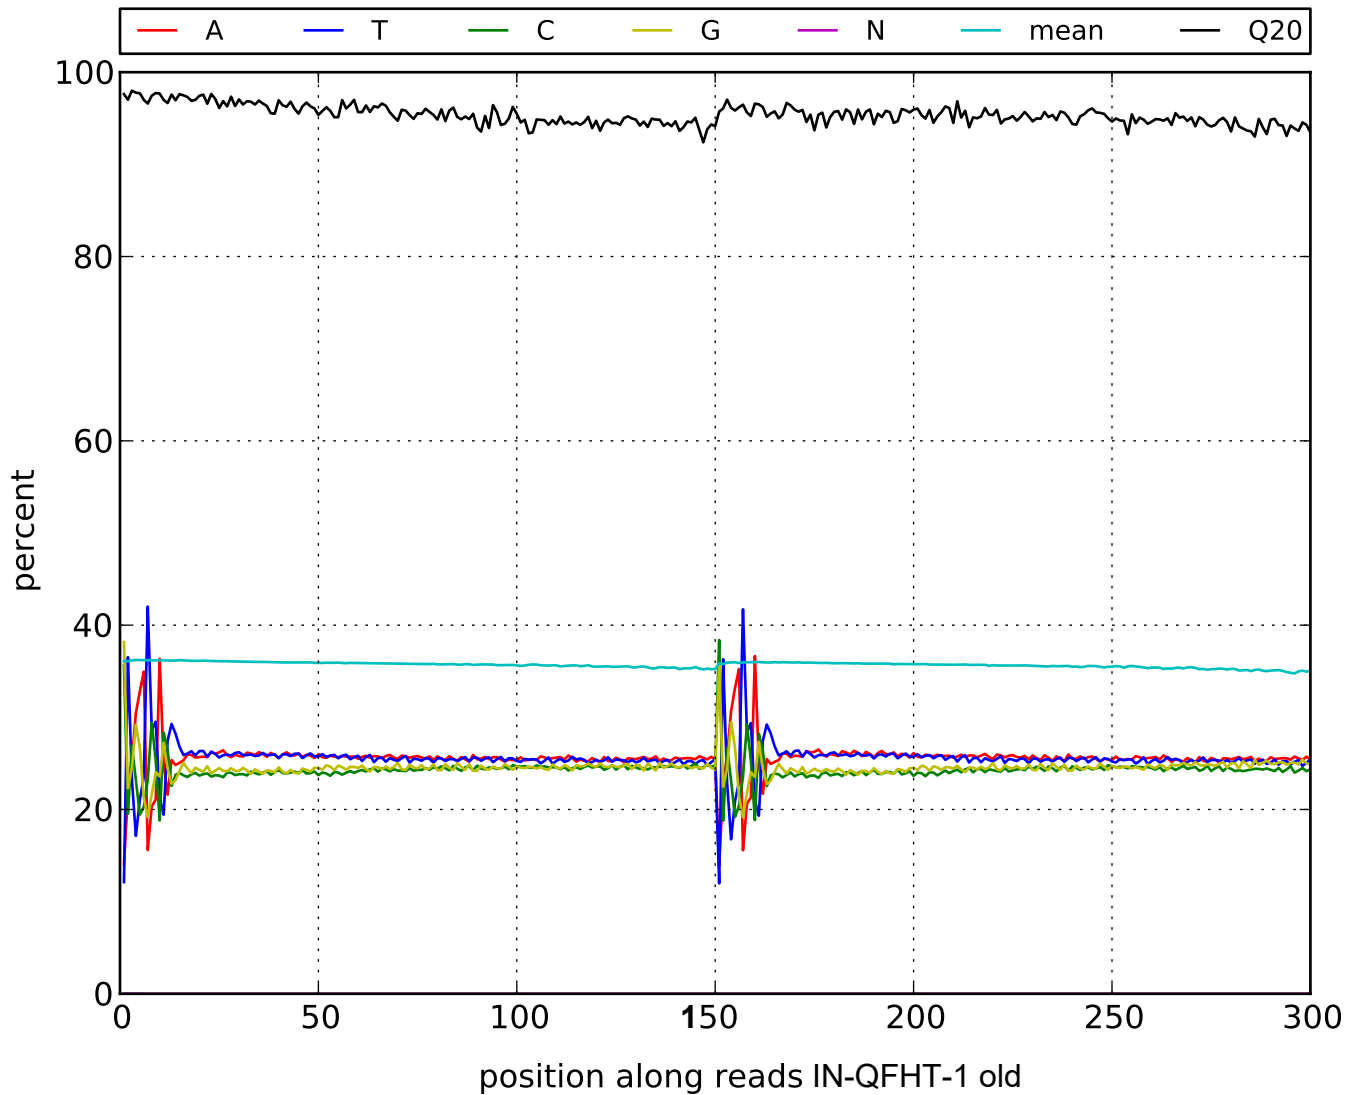

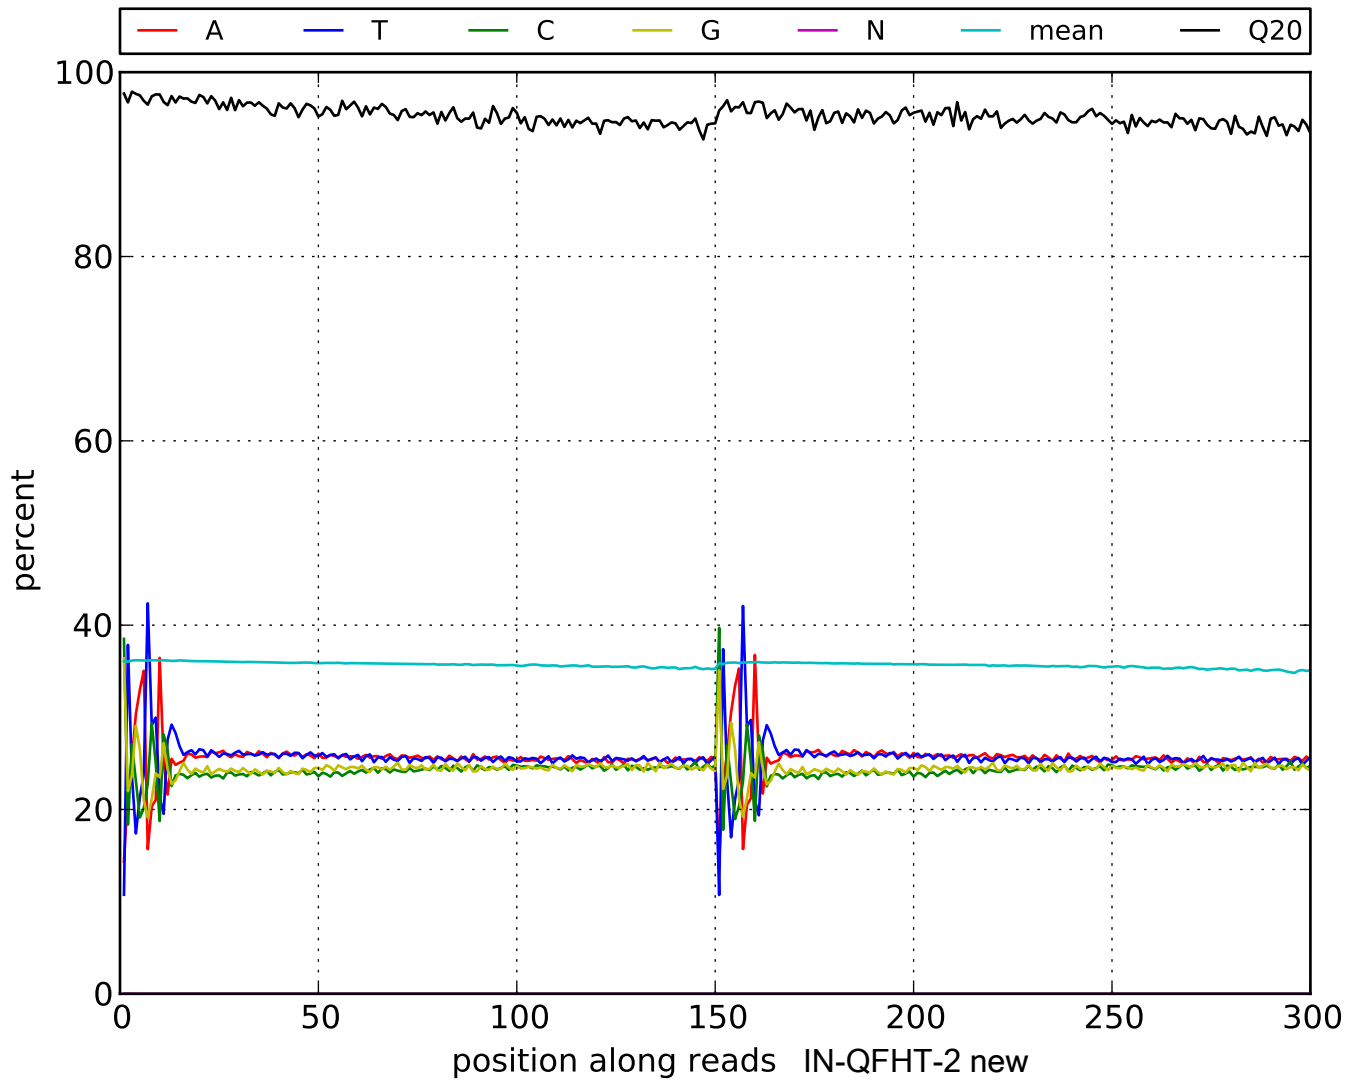

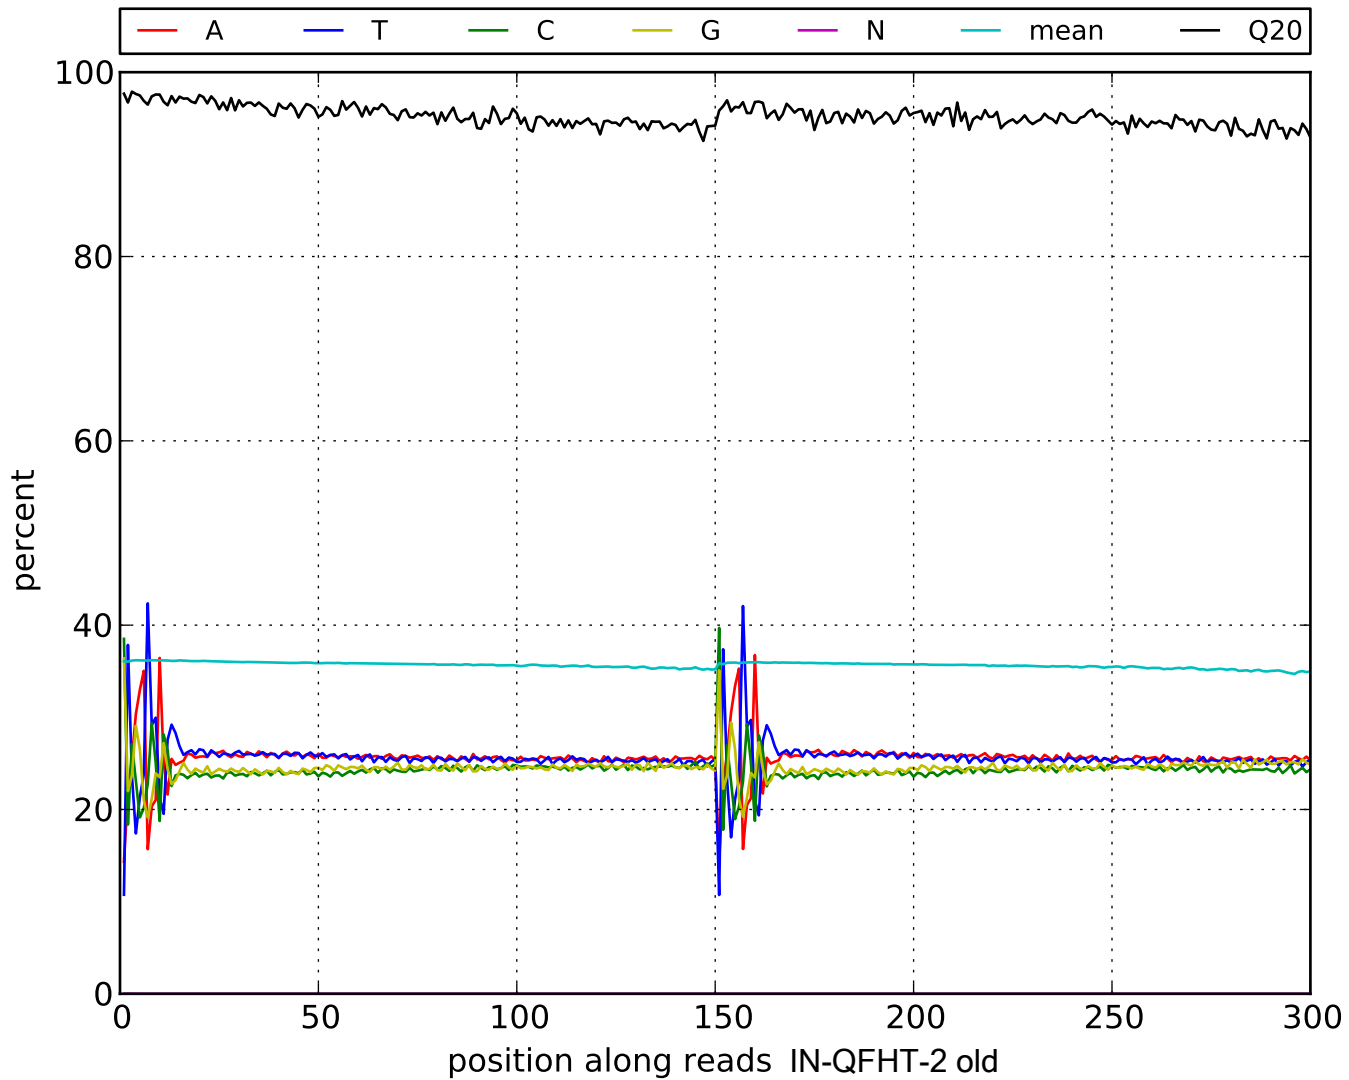

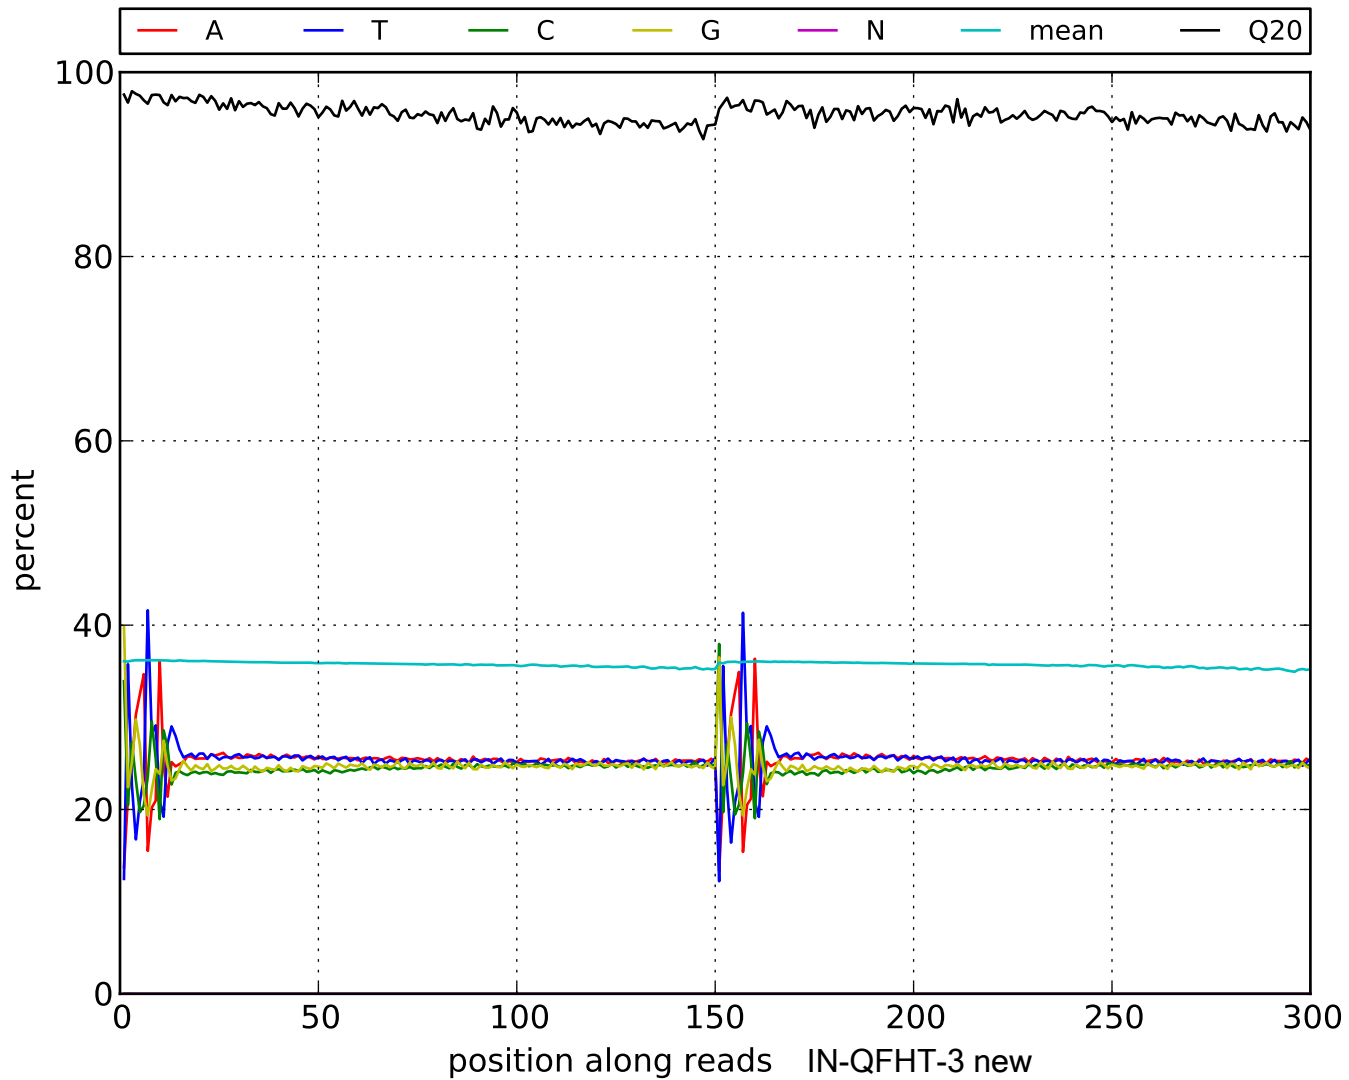

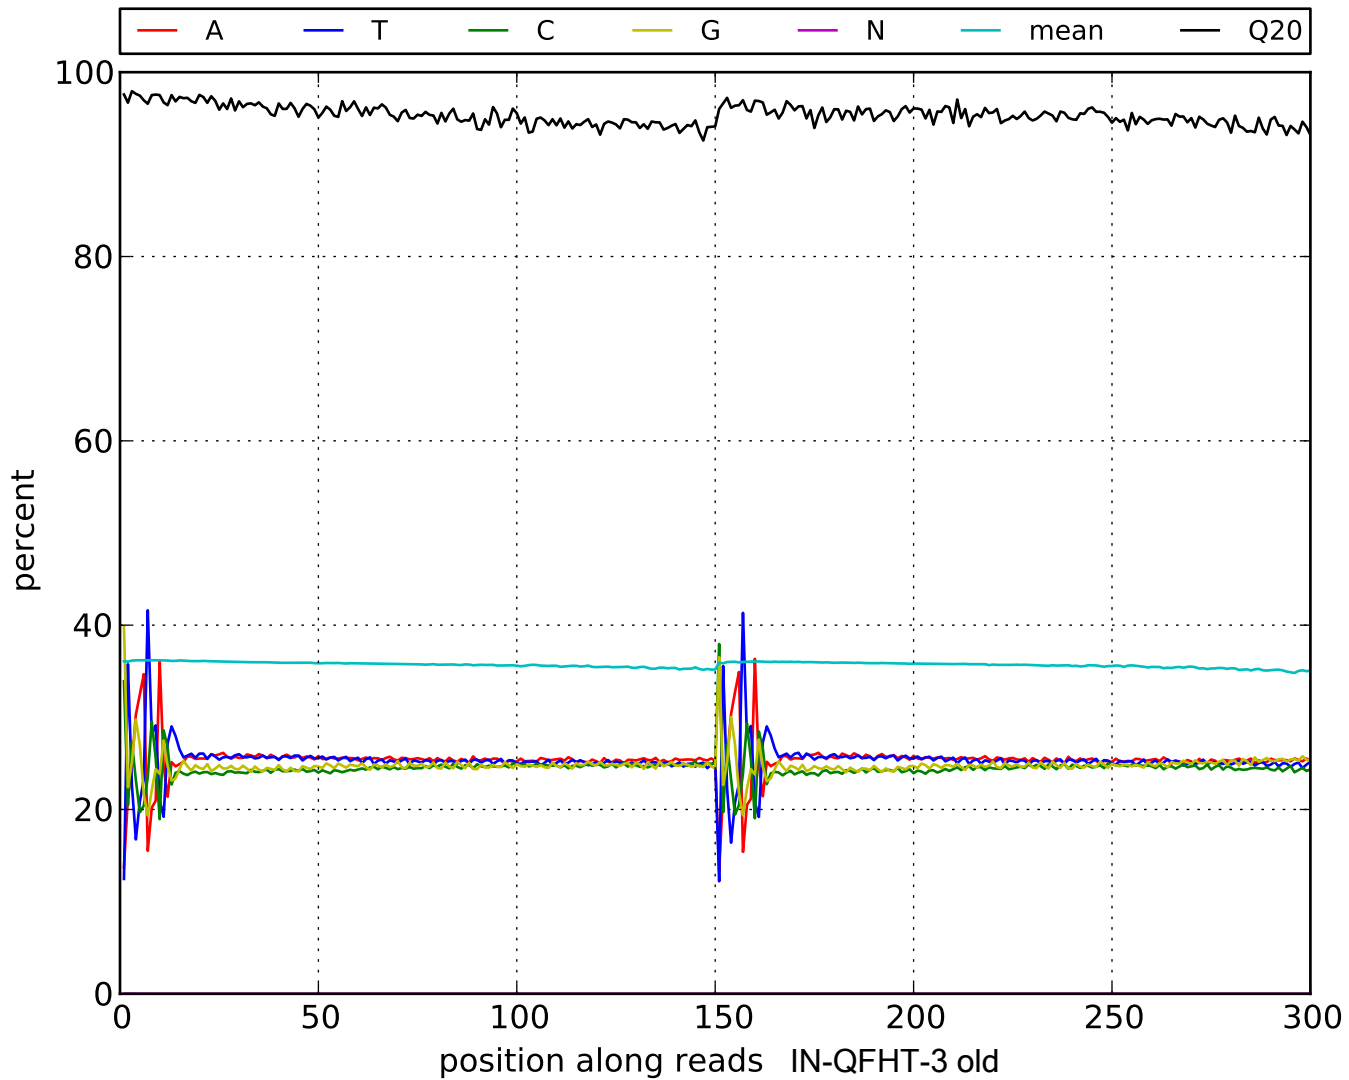

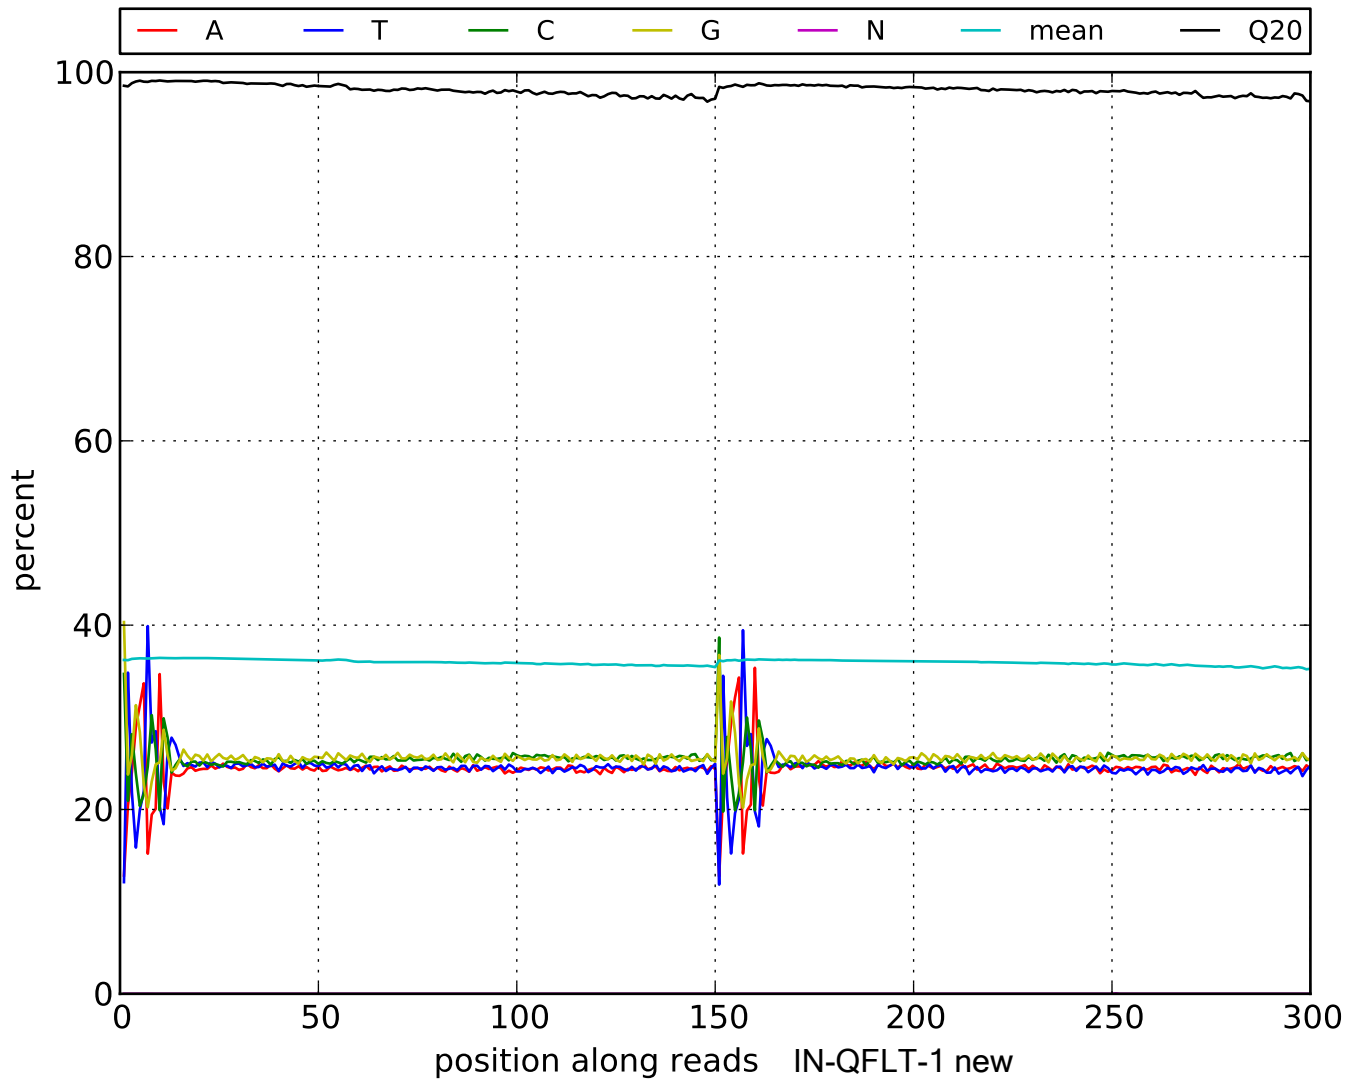

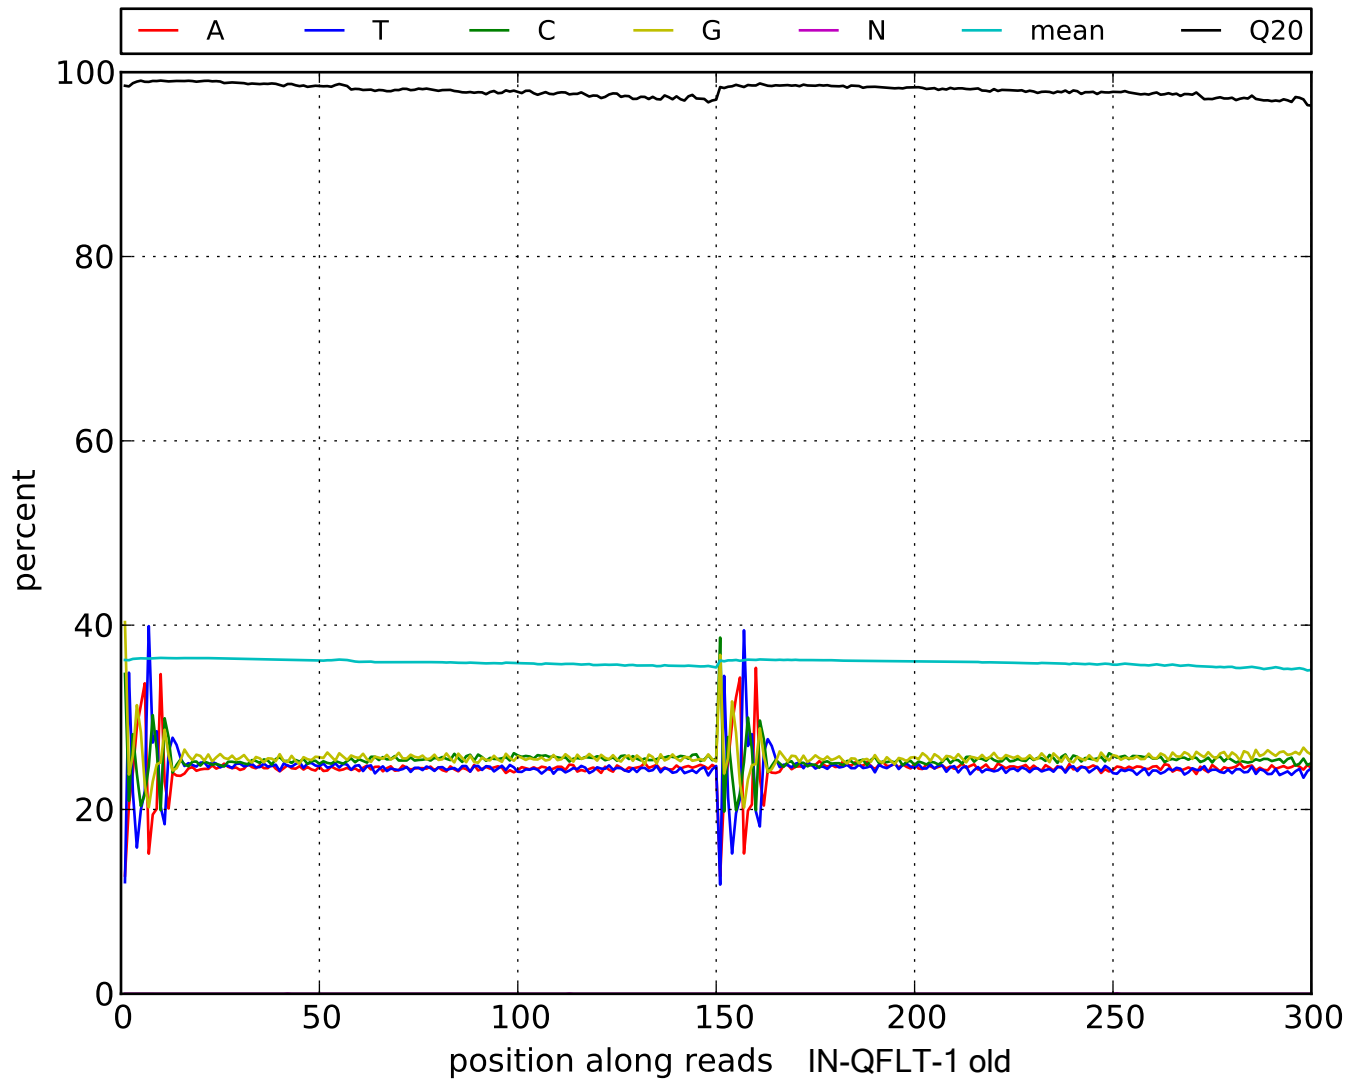

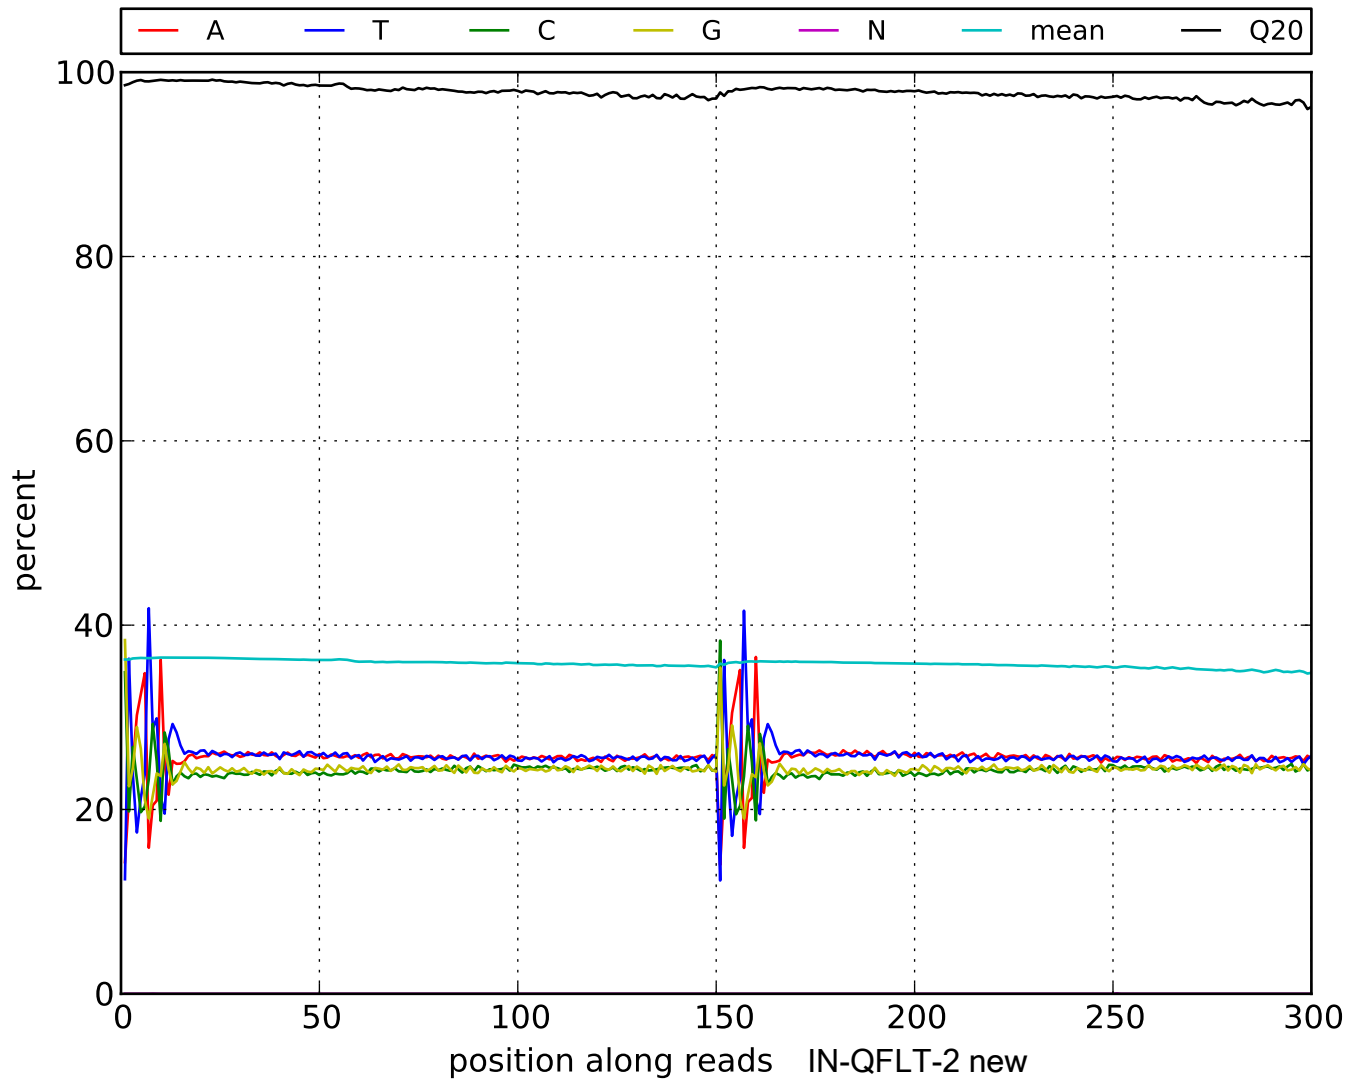

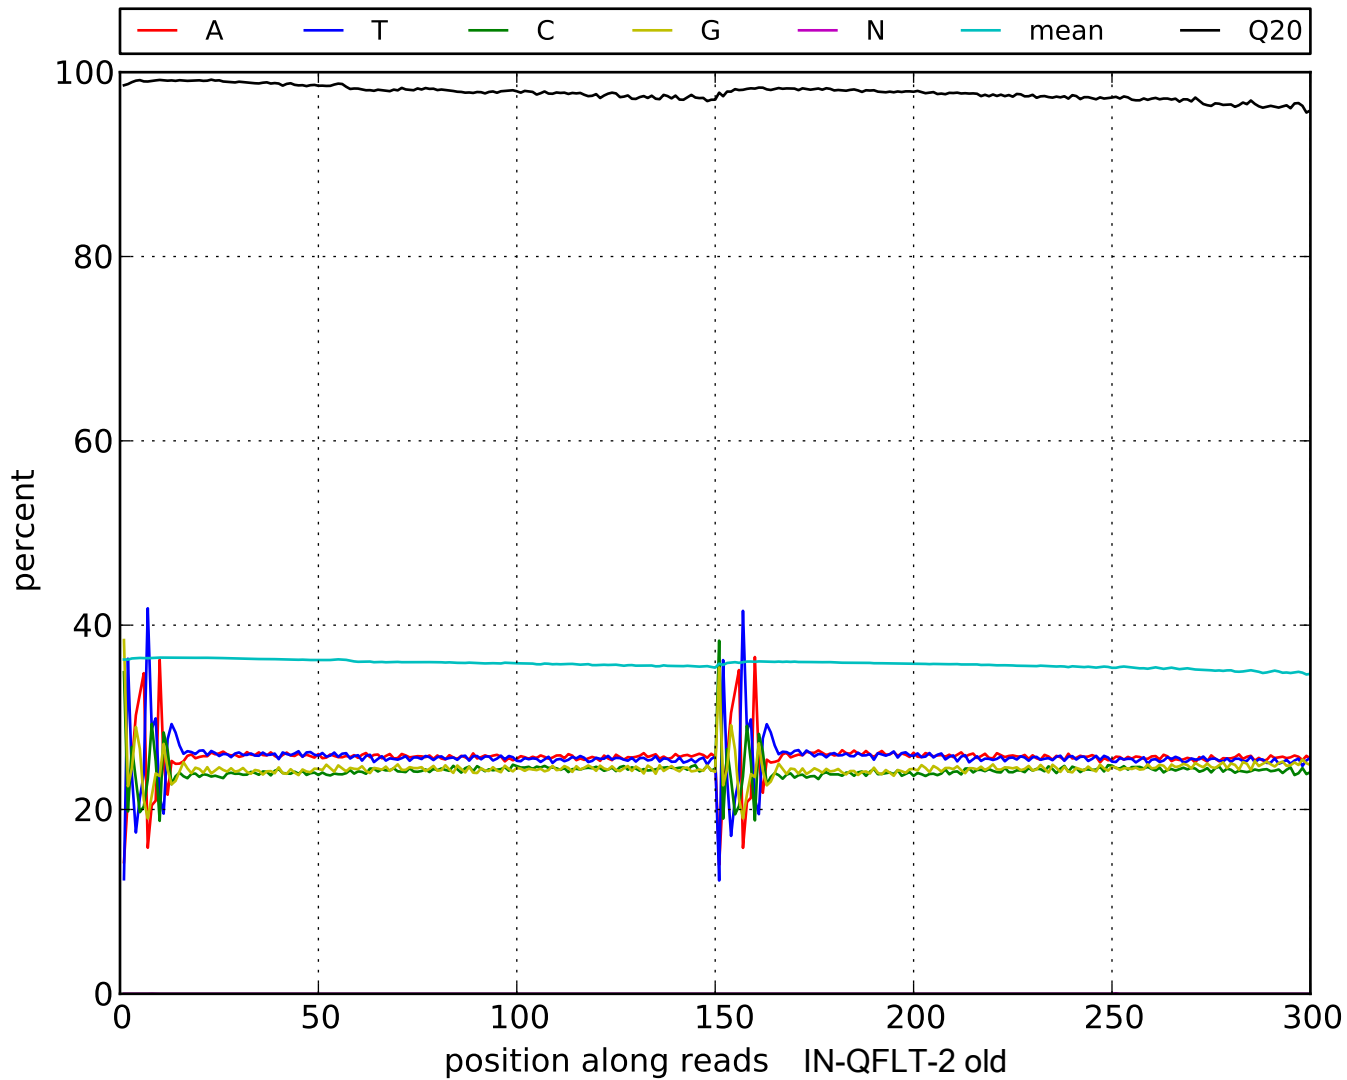

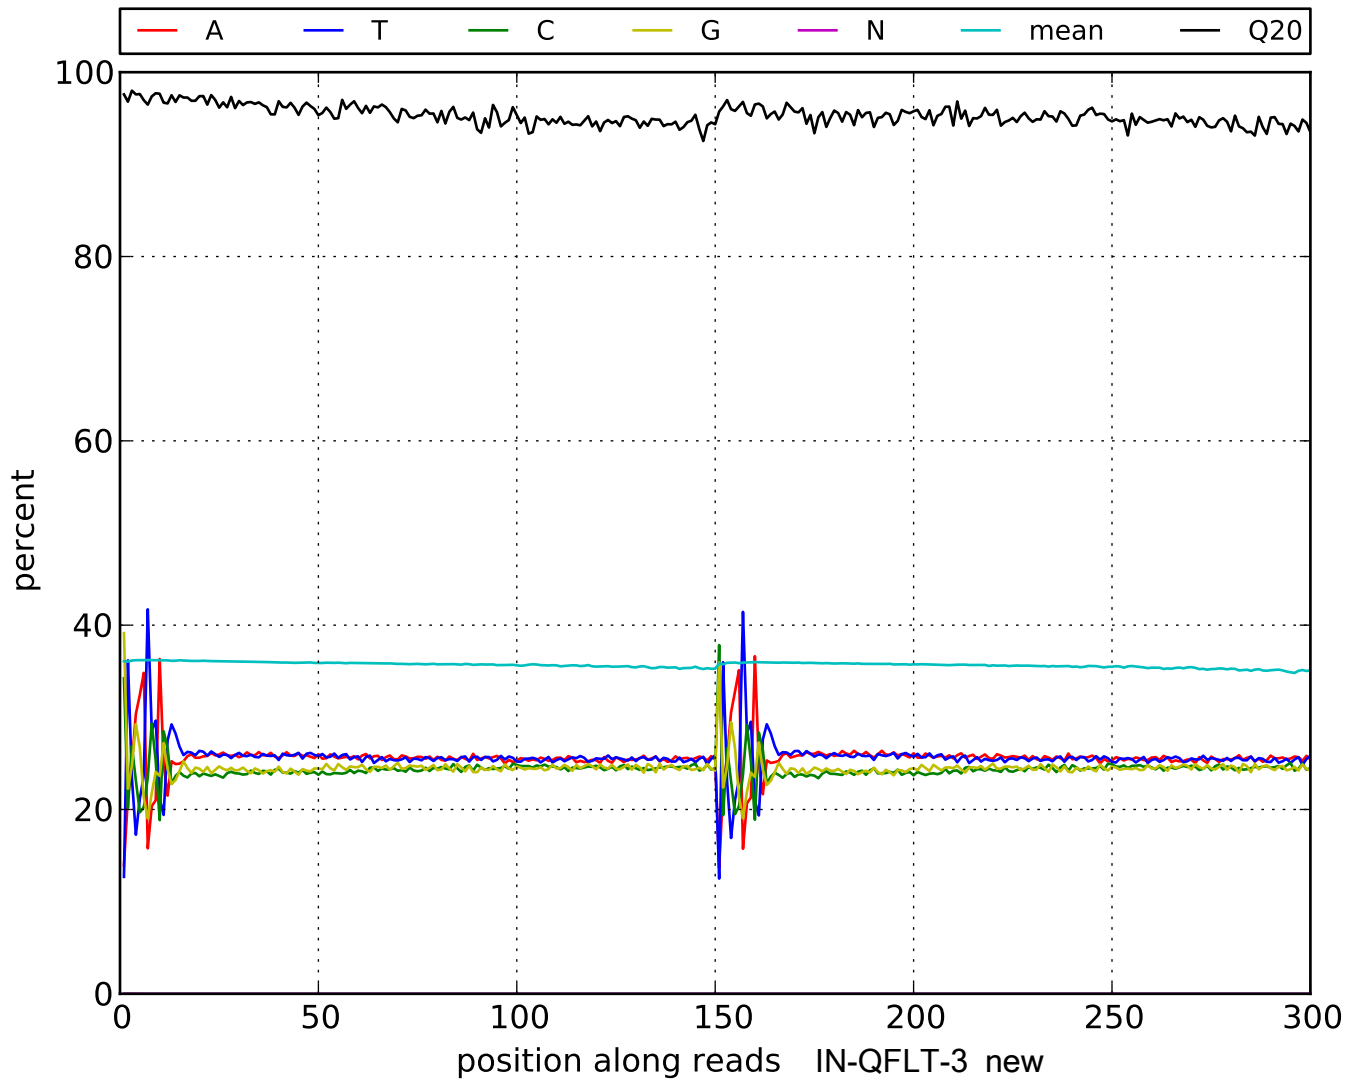

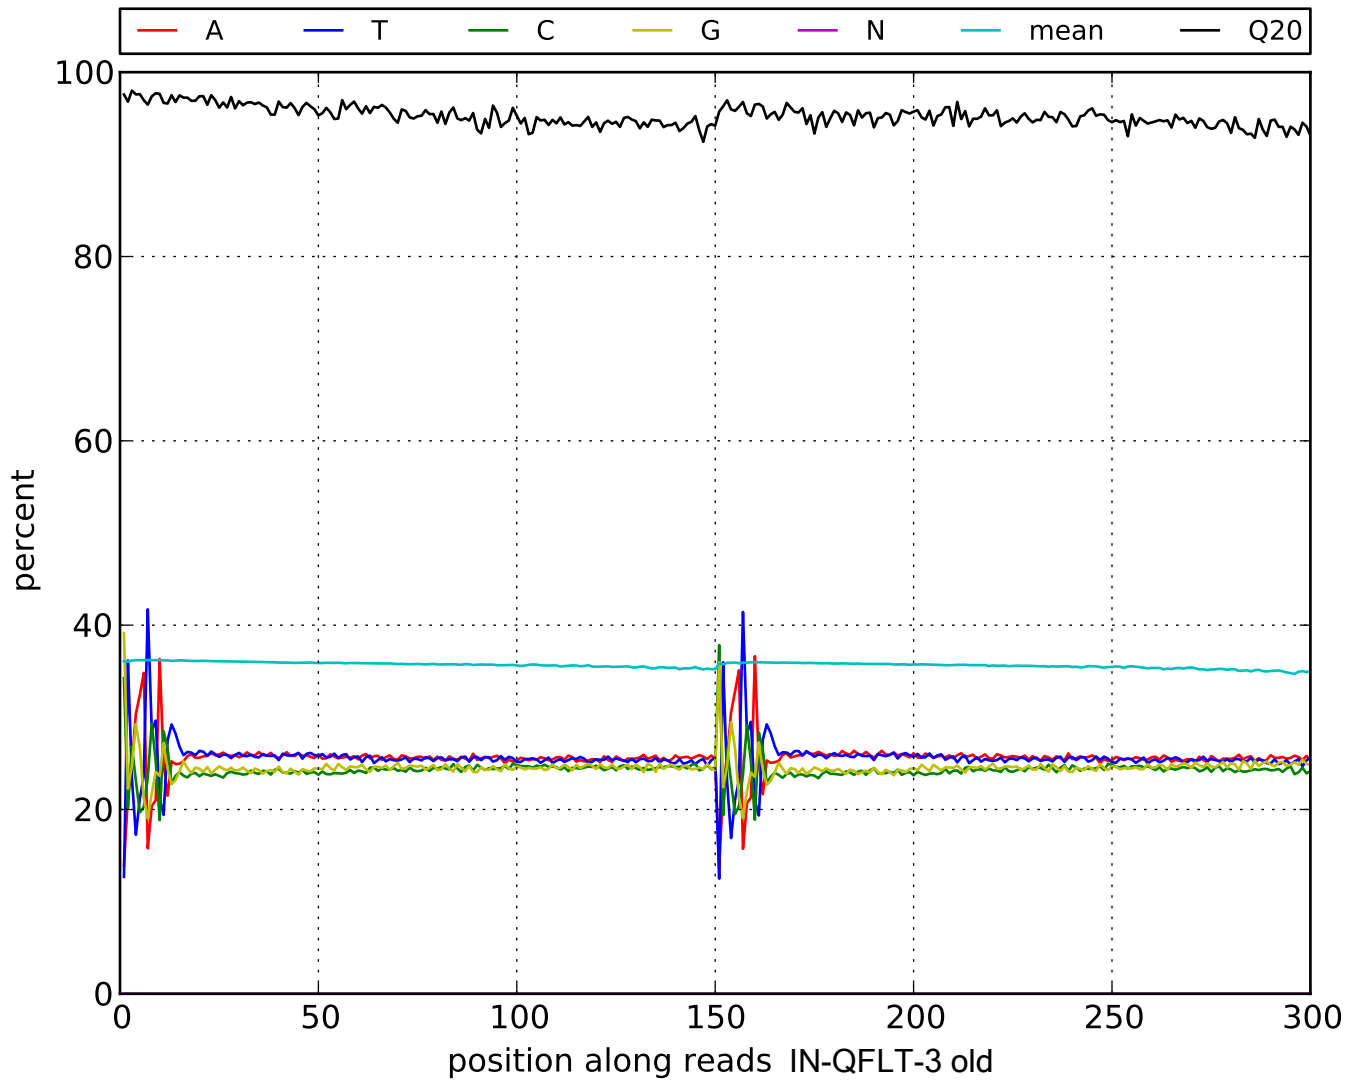

Supplement: Supplementary file 7 [file 83423398bfa9e380de16183e.pdf]
