# Supplementary material for: Transcriptome-wide N6-methyladenosine methylome profiling of Bombyx mori reveals a potential mechanism of epigenetic regulation on diapause
Source: Research Square preprint supplement (doi:10.21203/rs.3.rs-1561012/v1), 2022-04-18

## 目录

|                             |   |
|-----------------------------|---|
| IP-QFHT-1.peaks.qvalue..... | 1 |
| IP-QFHT-2.peaks.qvalue..... | 2 |
| IP-QFHT-3.peaks.qvalue..... | 3 |
| IP-QFLT-1.peaks.qvalue..... | 4 |
| IP-QFLT-2.peaks.qvalue..... | 5 |
| IP-QFLT-3.peaks.qvalue..... | 6 |

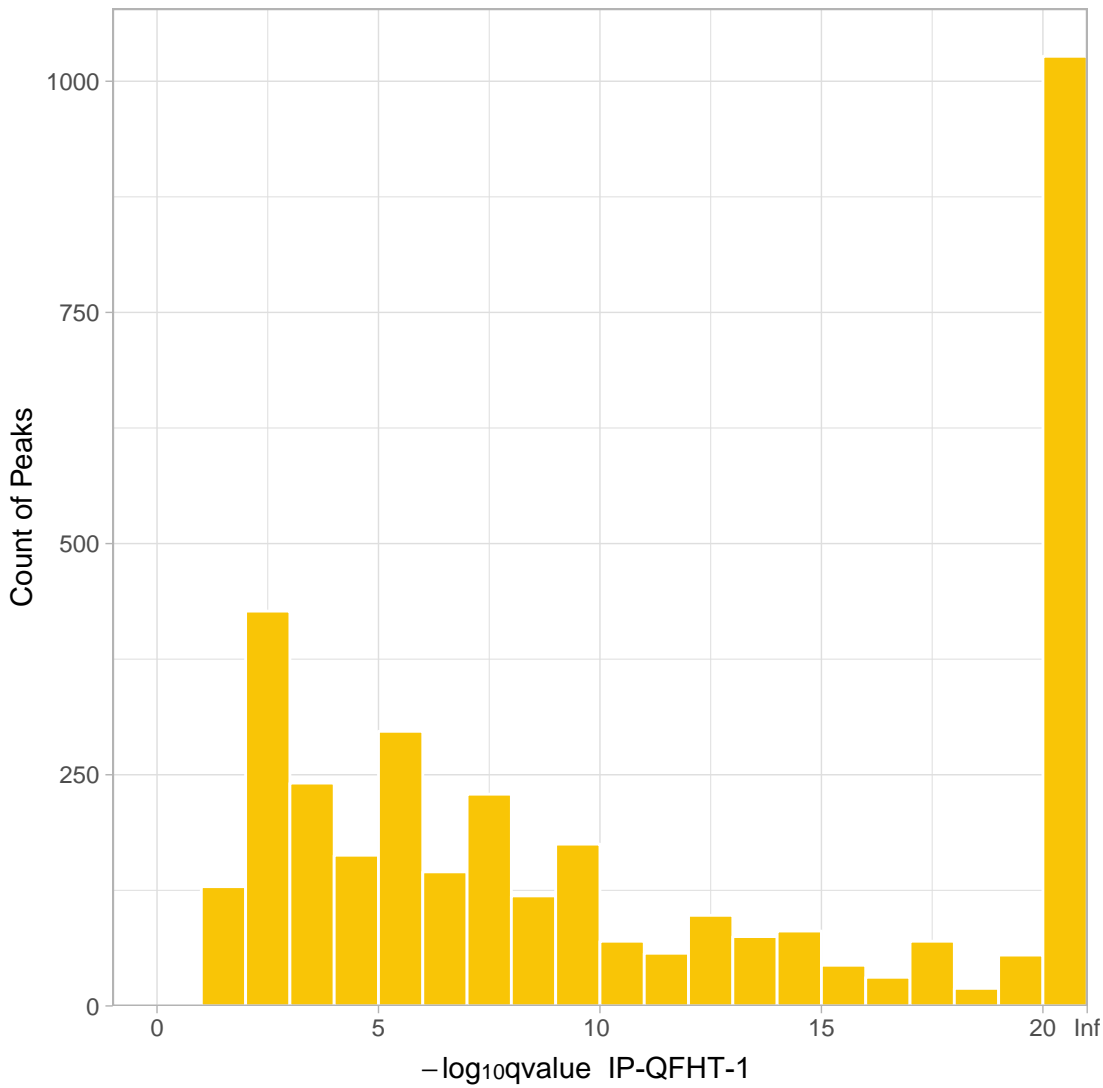

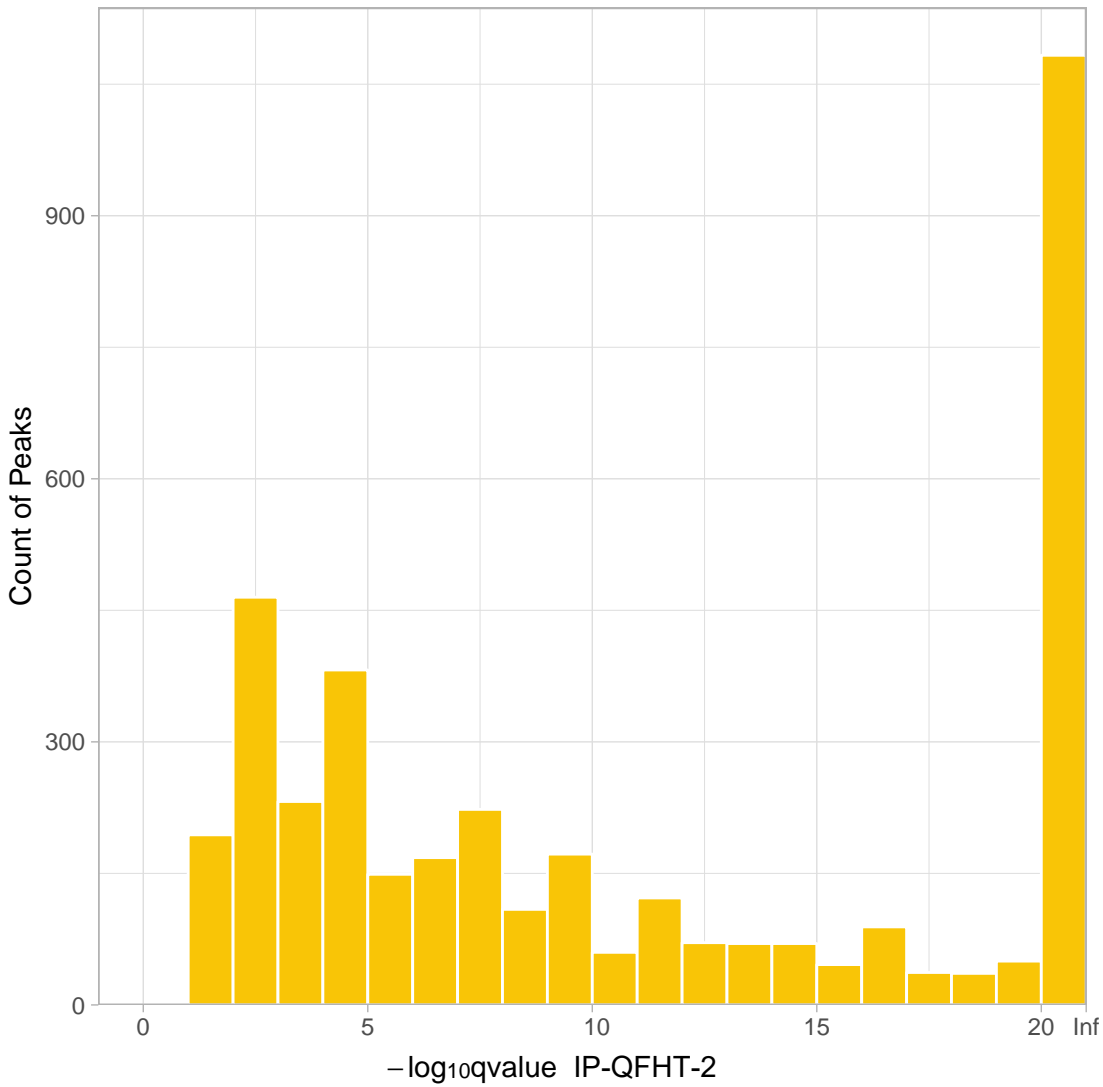

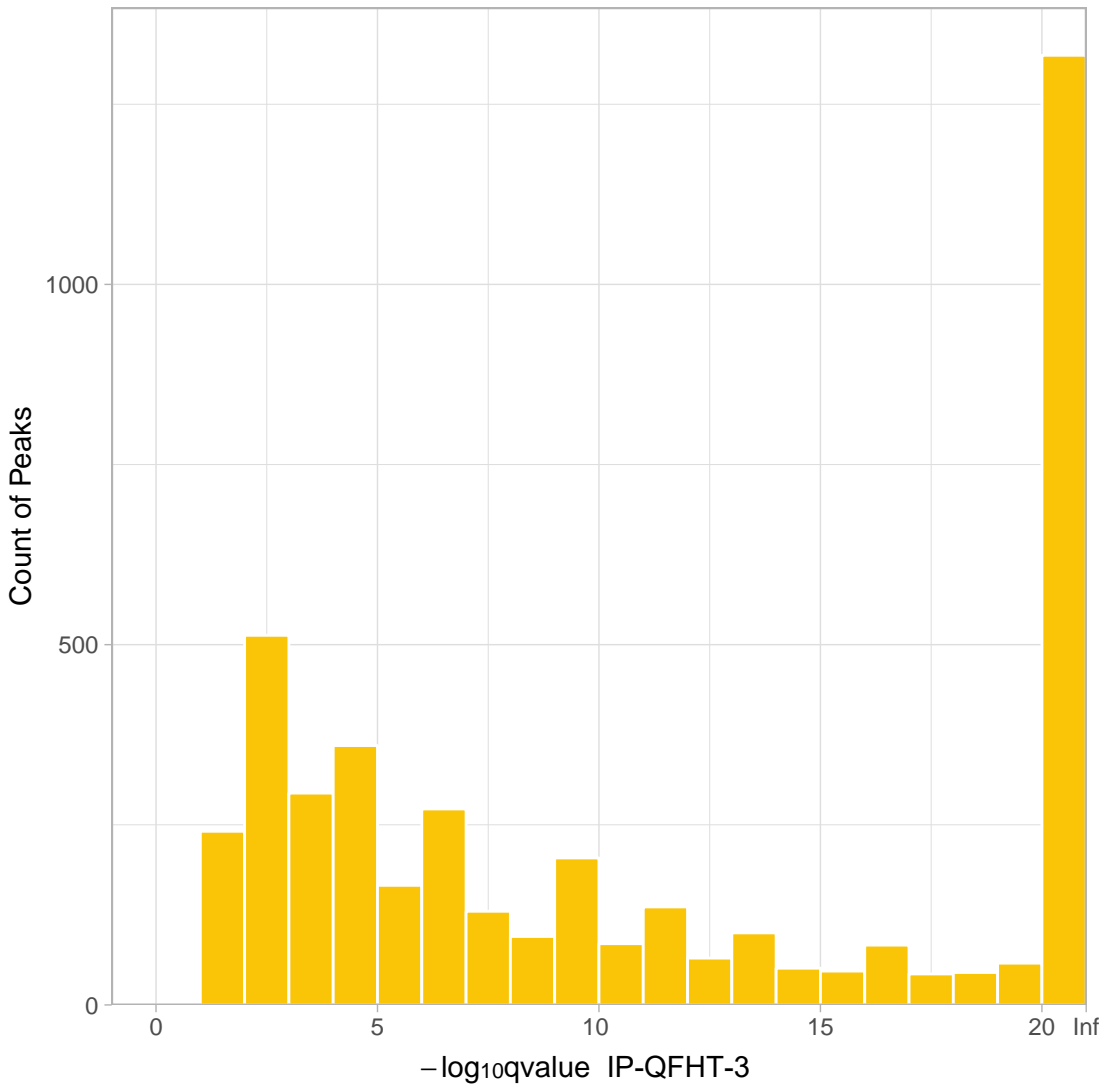

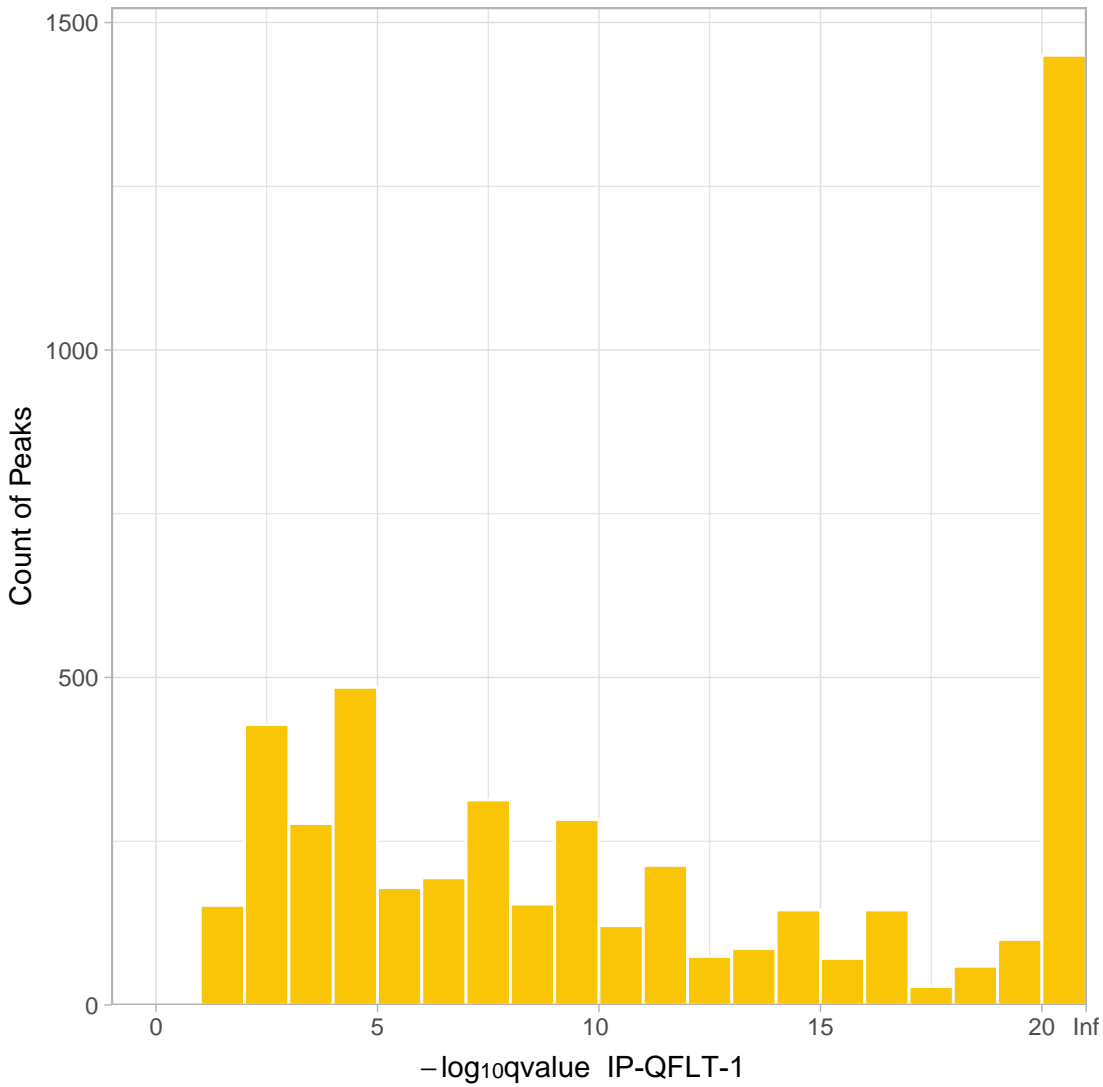

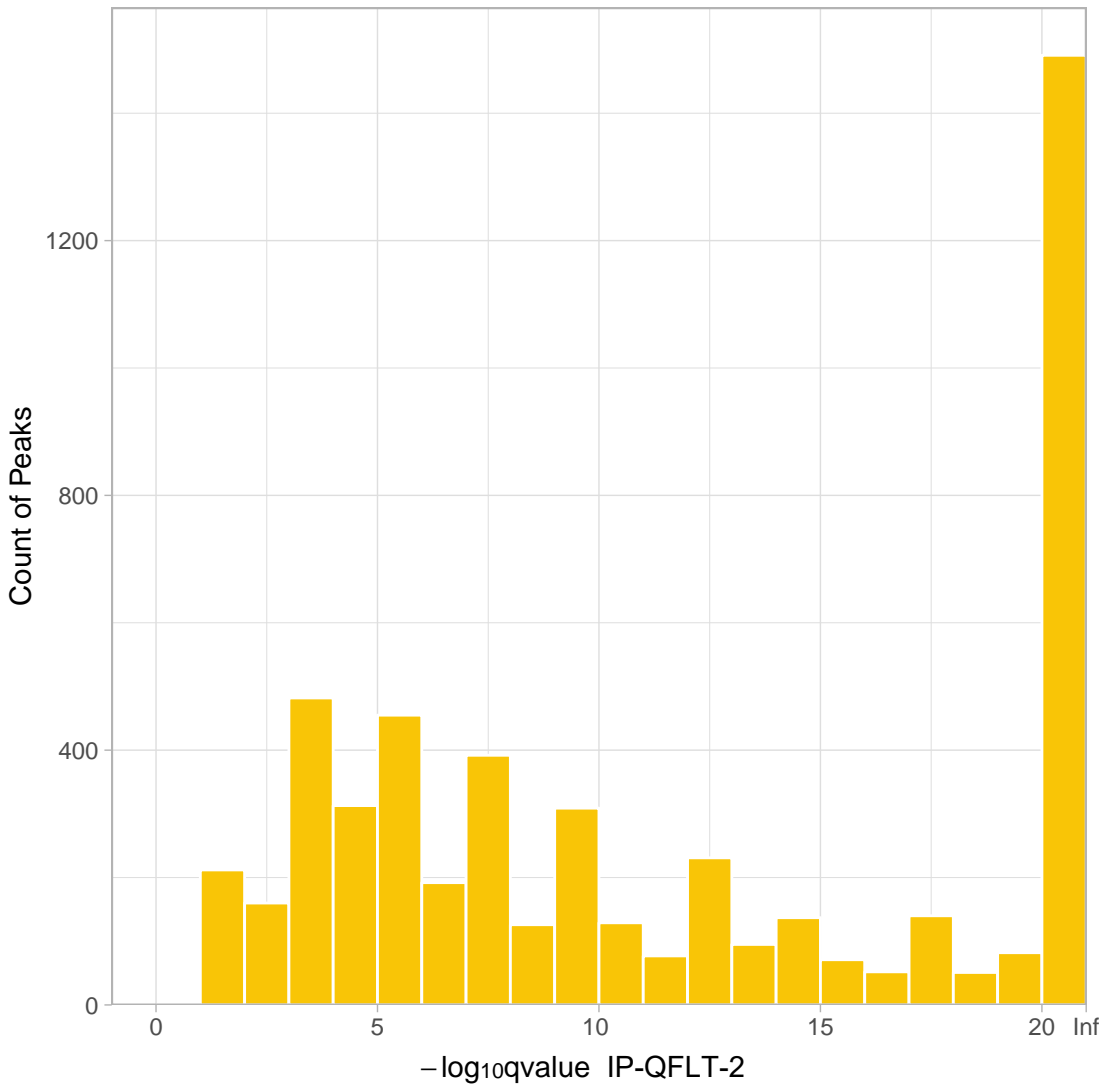

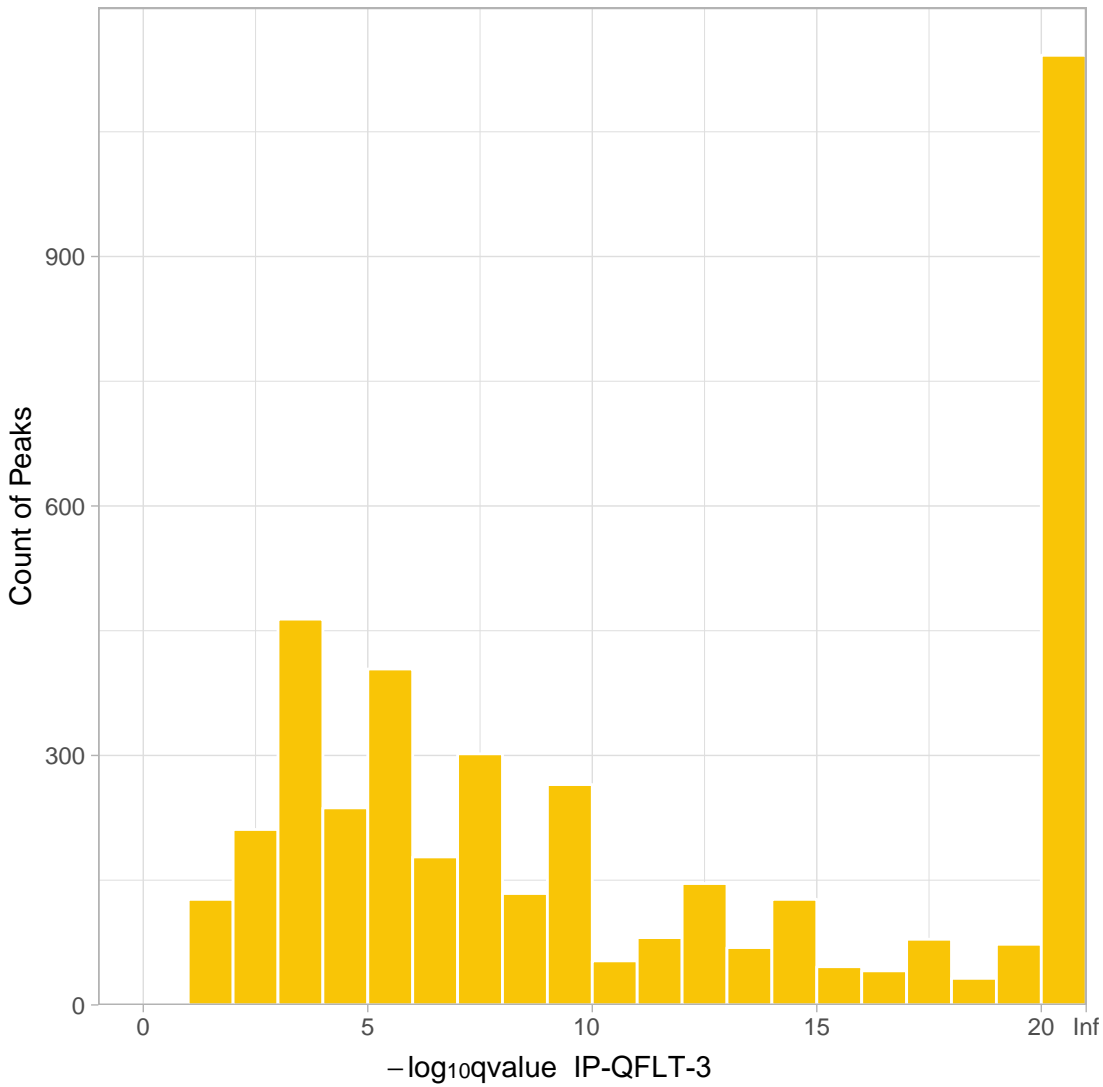

Supplement: Supplementary file 2 [file 2fd5931bdda1c7cf3102e440.pdf]
