# Supplementary material for: Transcriptome-wide N6-methyladenosine methylome profiling of Bombyx mori reveals a potential mechanism of epigenetic regulation on diapause
Source: Research Square preprint supplement (doi:10.21203/rs.3.rs-1561012/v1), 2022-04-18

## 目录

|                                 |   |
|---------------------------------|---|
| IP-QFHT-1.peaks.fold_enrichment | 1 |
| IP-QFHT-2.peaks.fold_enrichment | 2 |
| IP-QFHT-3.peaks.fold_enrichment | 3 |
| IP-QFLT-1.peaks.fold_enrichment | 4 |
| IP-QFLT-2.peaks.fold_enrichment | 5 |
| IP-QFLT-3.peaks.fold_enrichment | 6 |

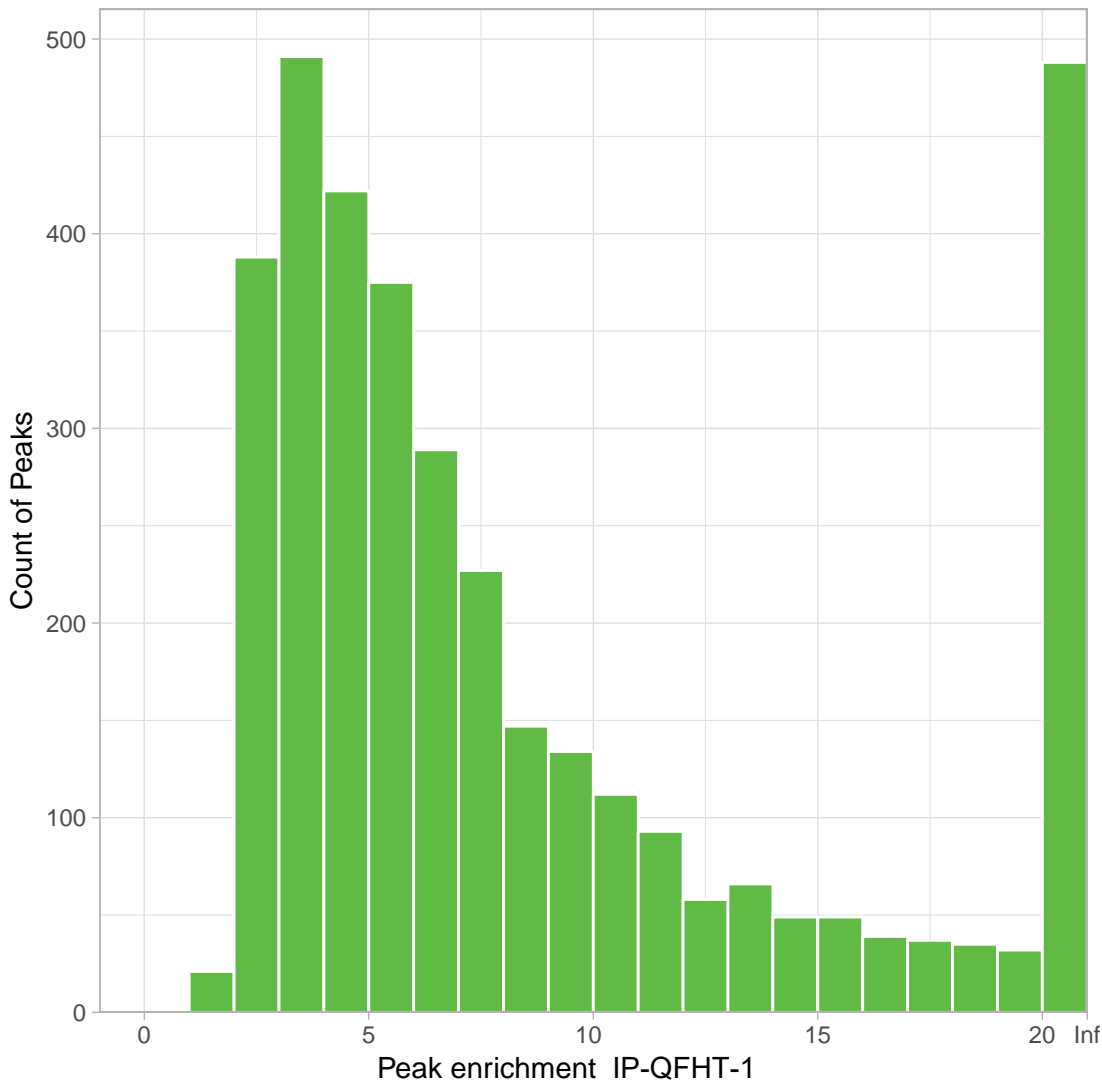

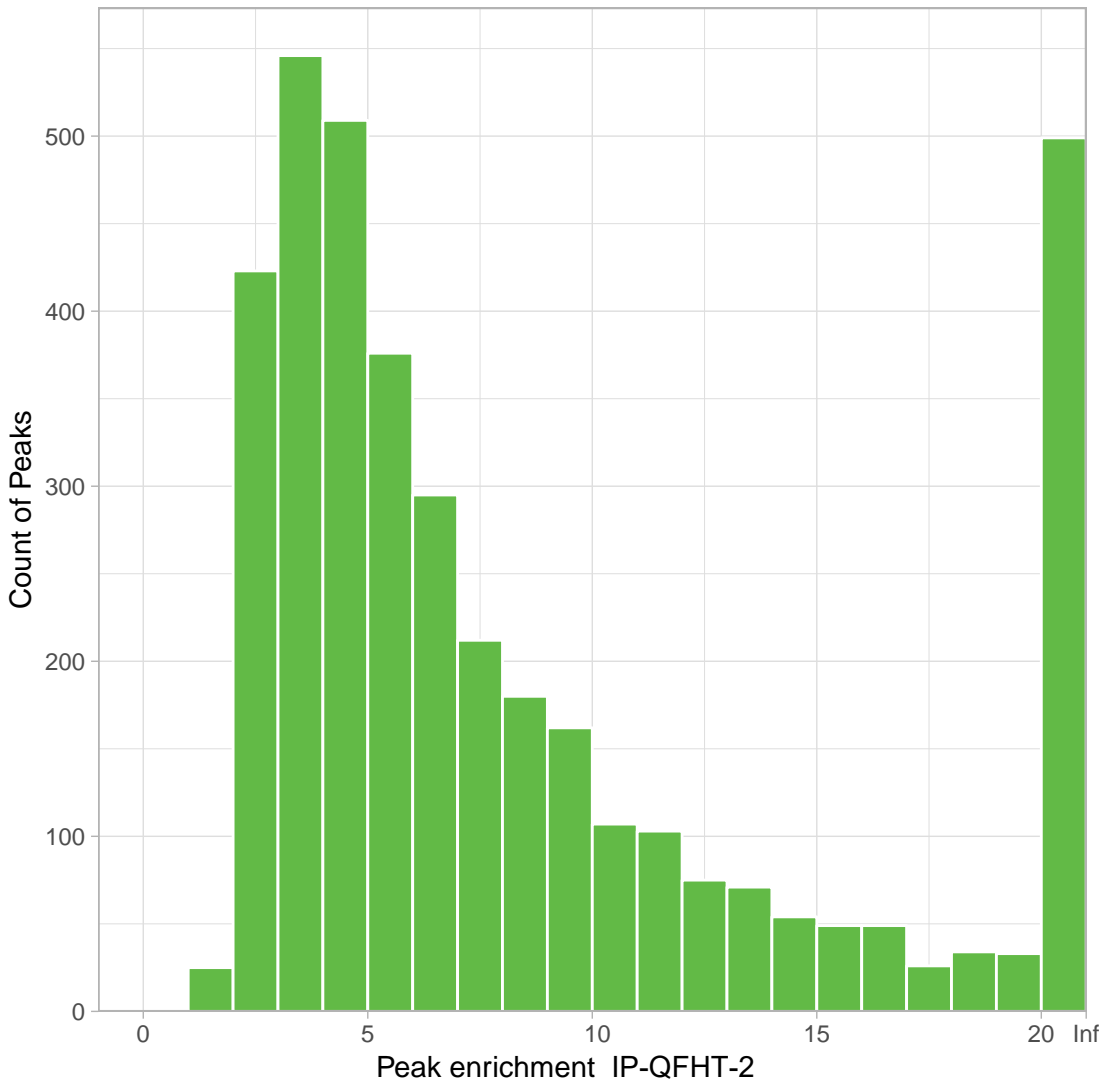

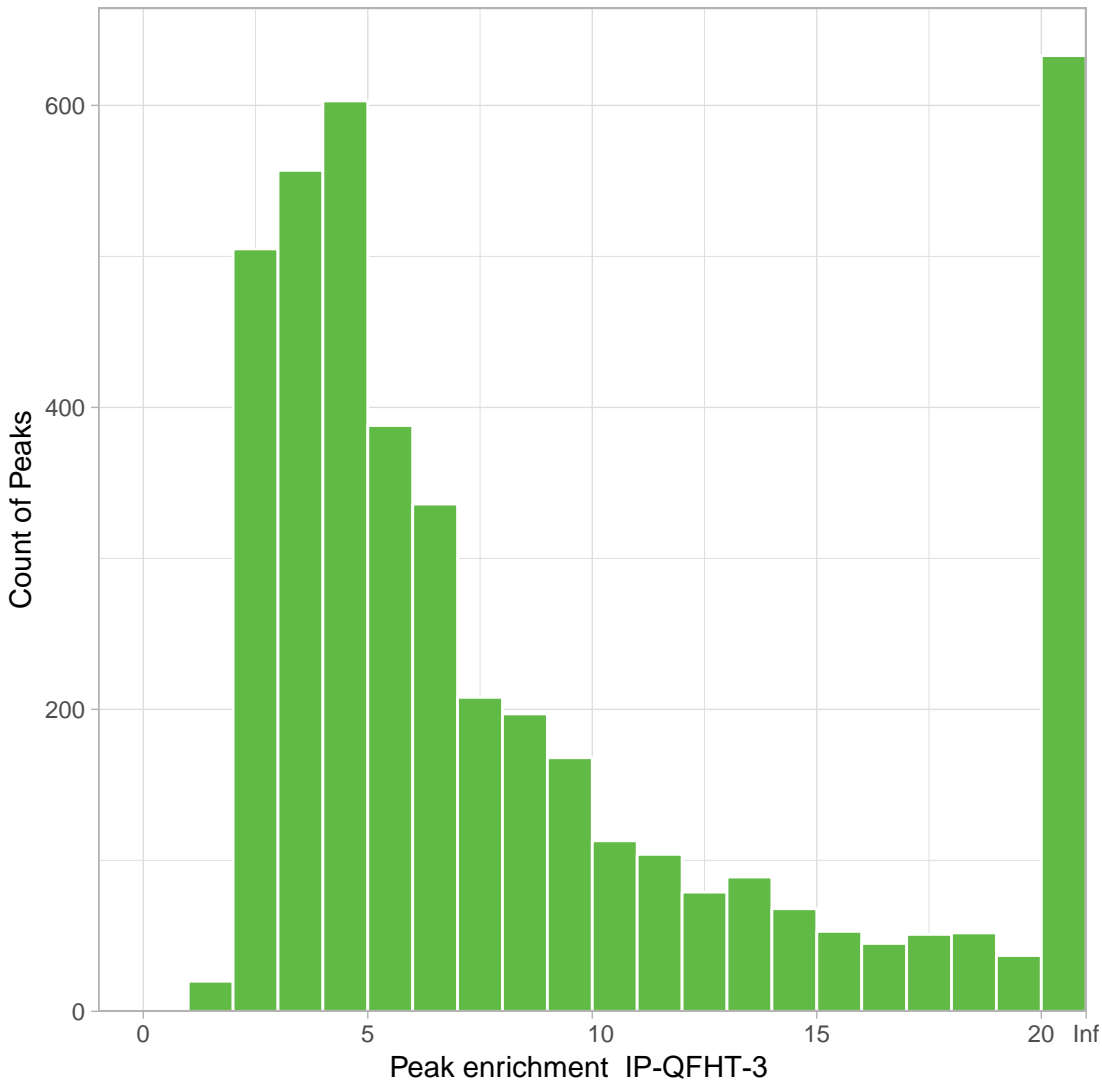

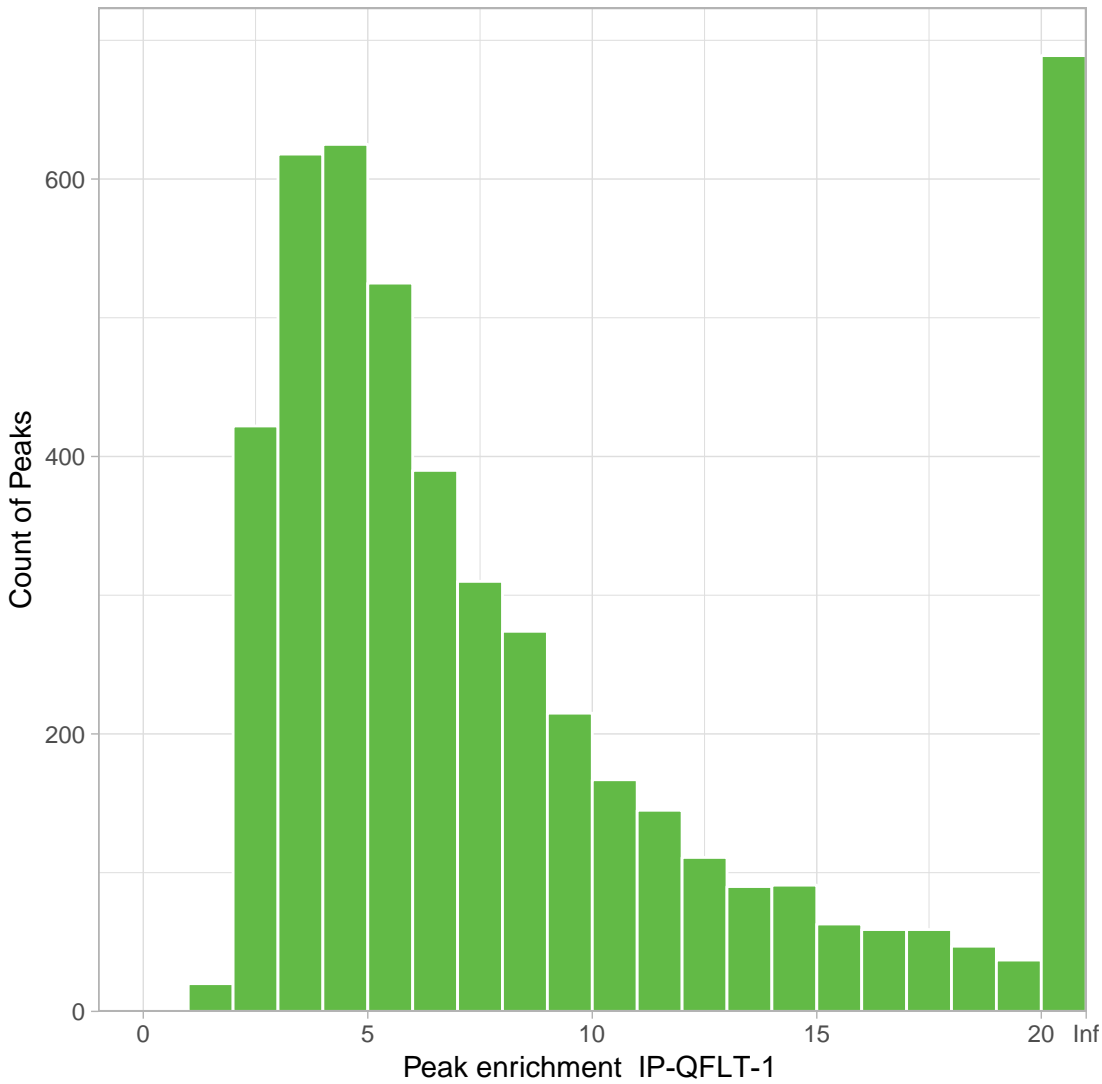

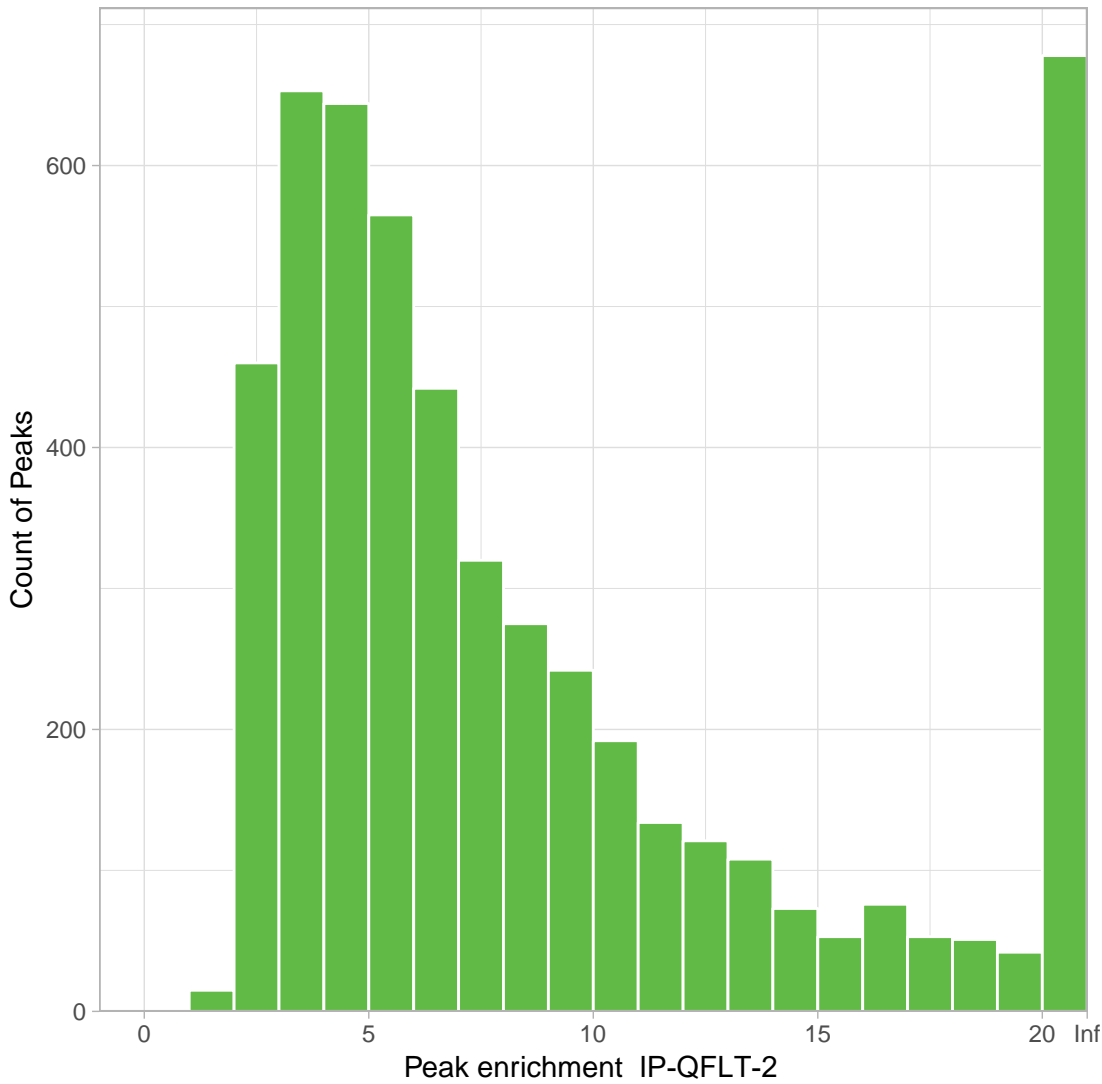

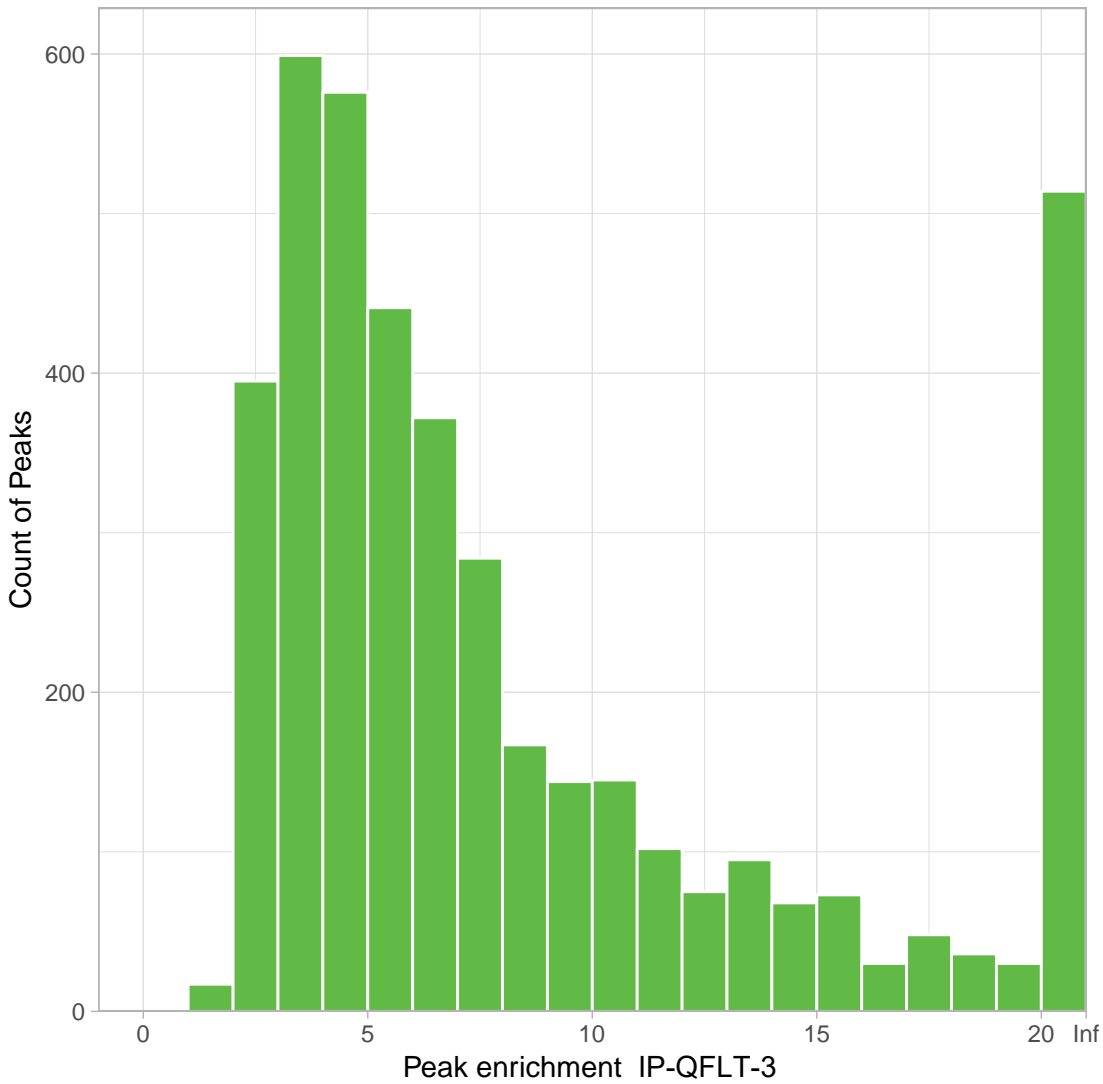

Supplement: Supplementary file 3 [file 43462aa8094e47565639fb62.pdf]
