# Supplementary material for: Transcriptome-wide N6-methyladenosine methylome profiling of Bombyx mori reveals a potential mechanism of epigenetic regulation on diapause
Source: Research Square preprint supplement (doi:10.21203/rs.3.rs-1561012/v1), 2022-04-18
Supplement: Supplementary file 4 [file 488718e6a064d7922cad7fd0.docx]

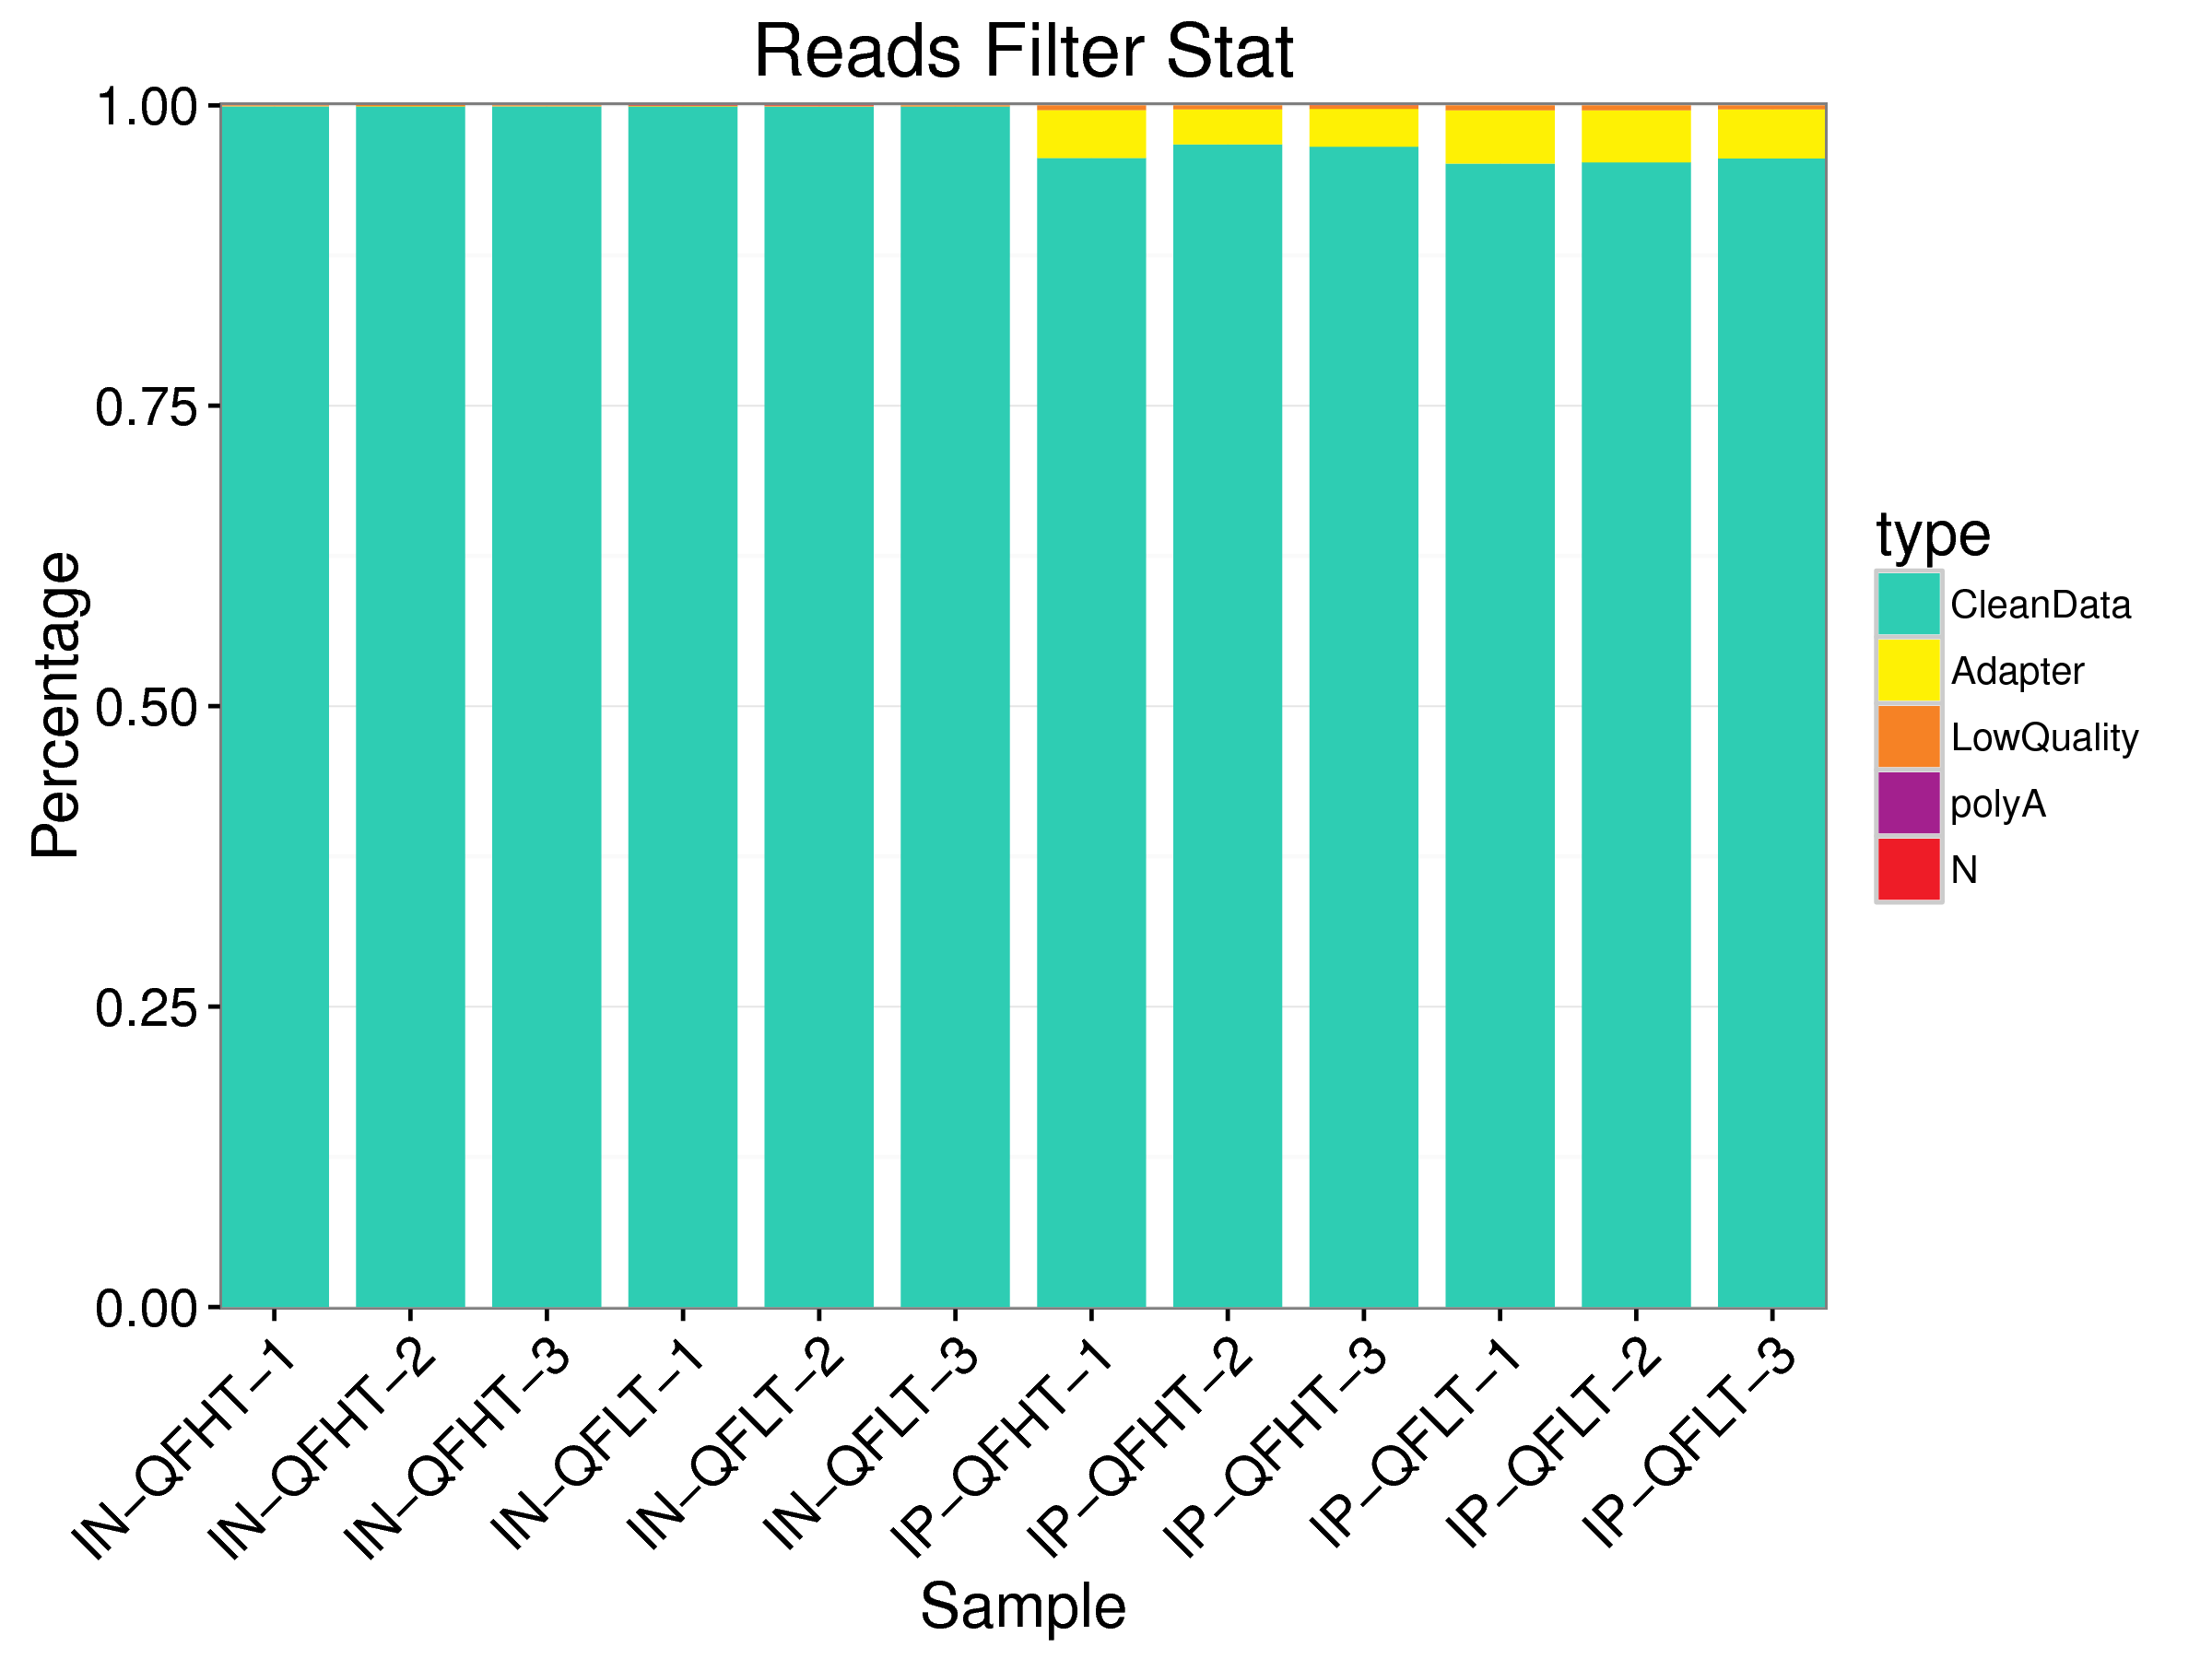


Figure S1. Data preprocessing distribution map (percentage)


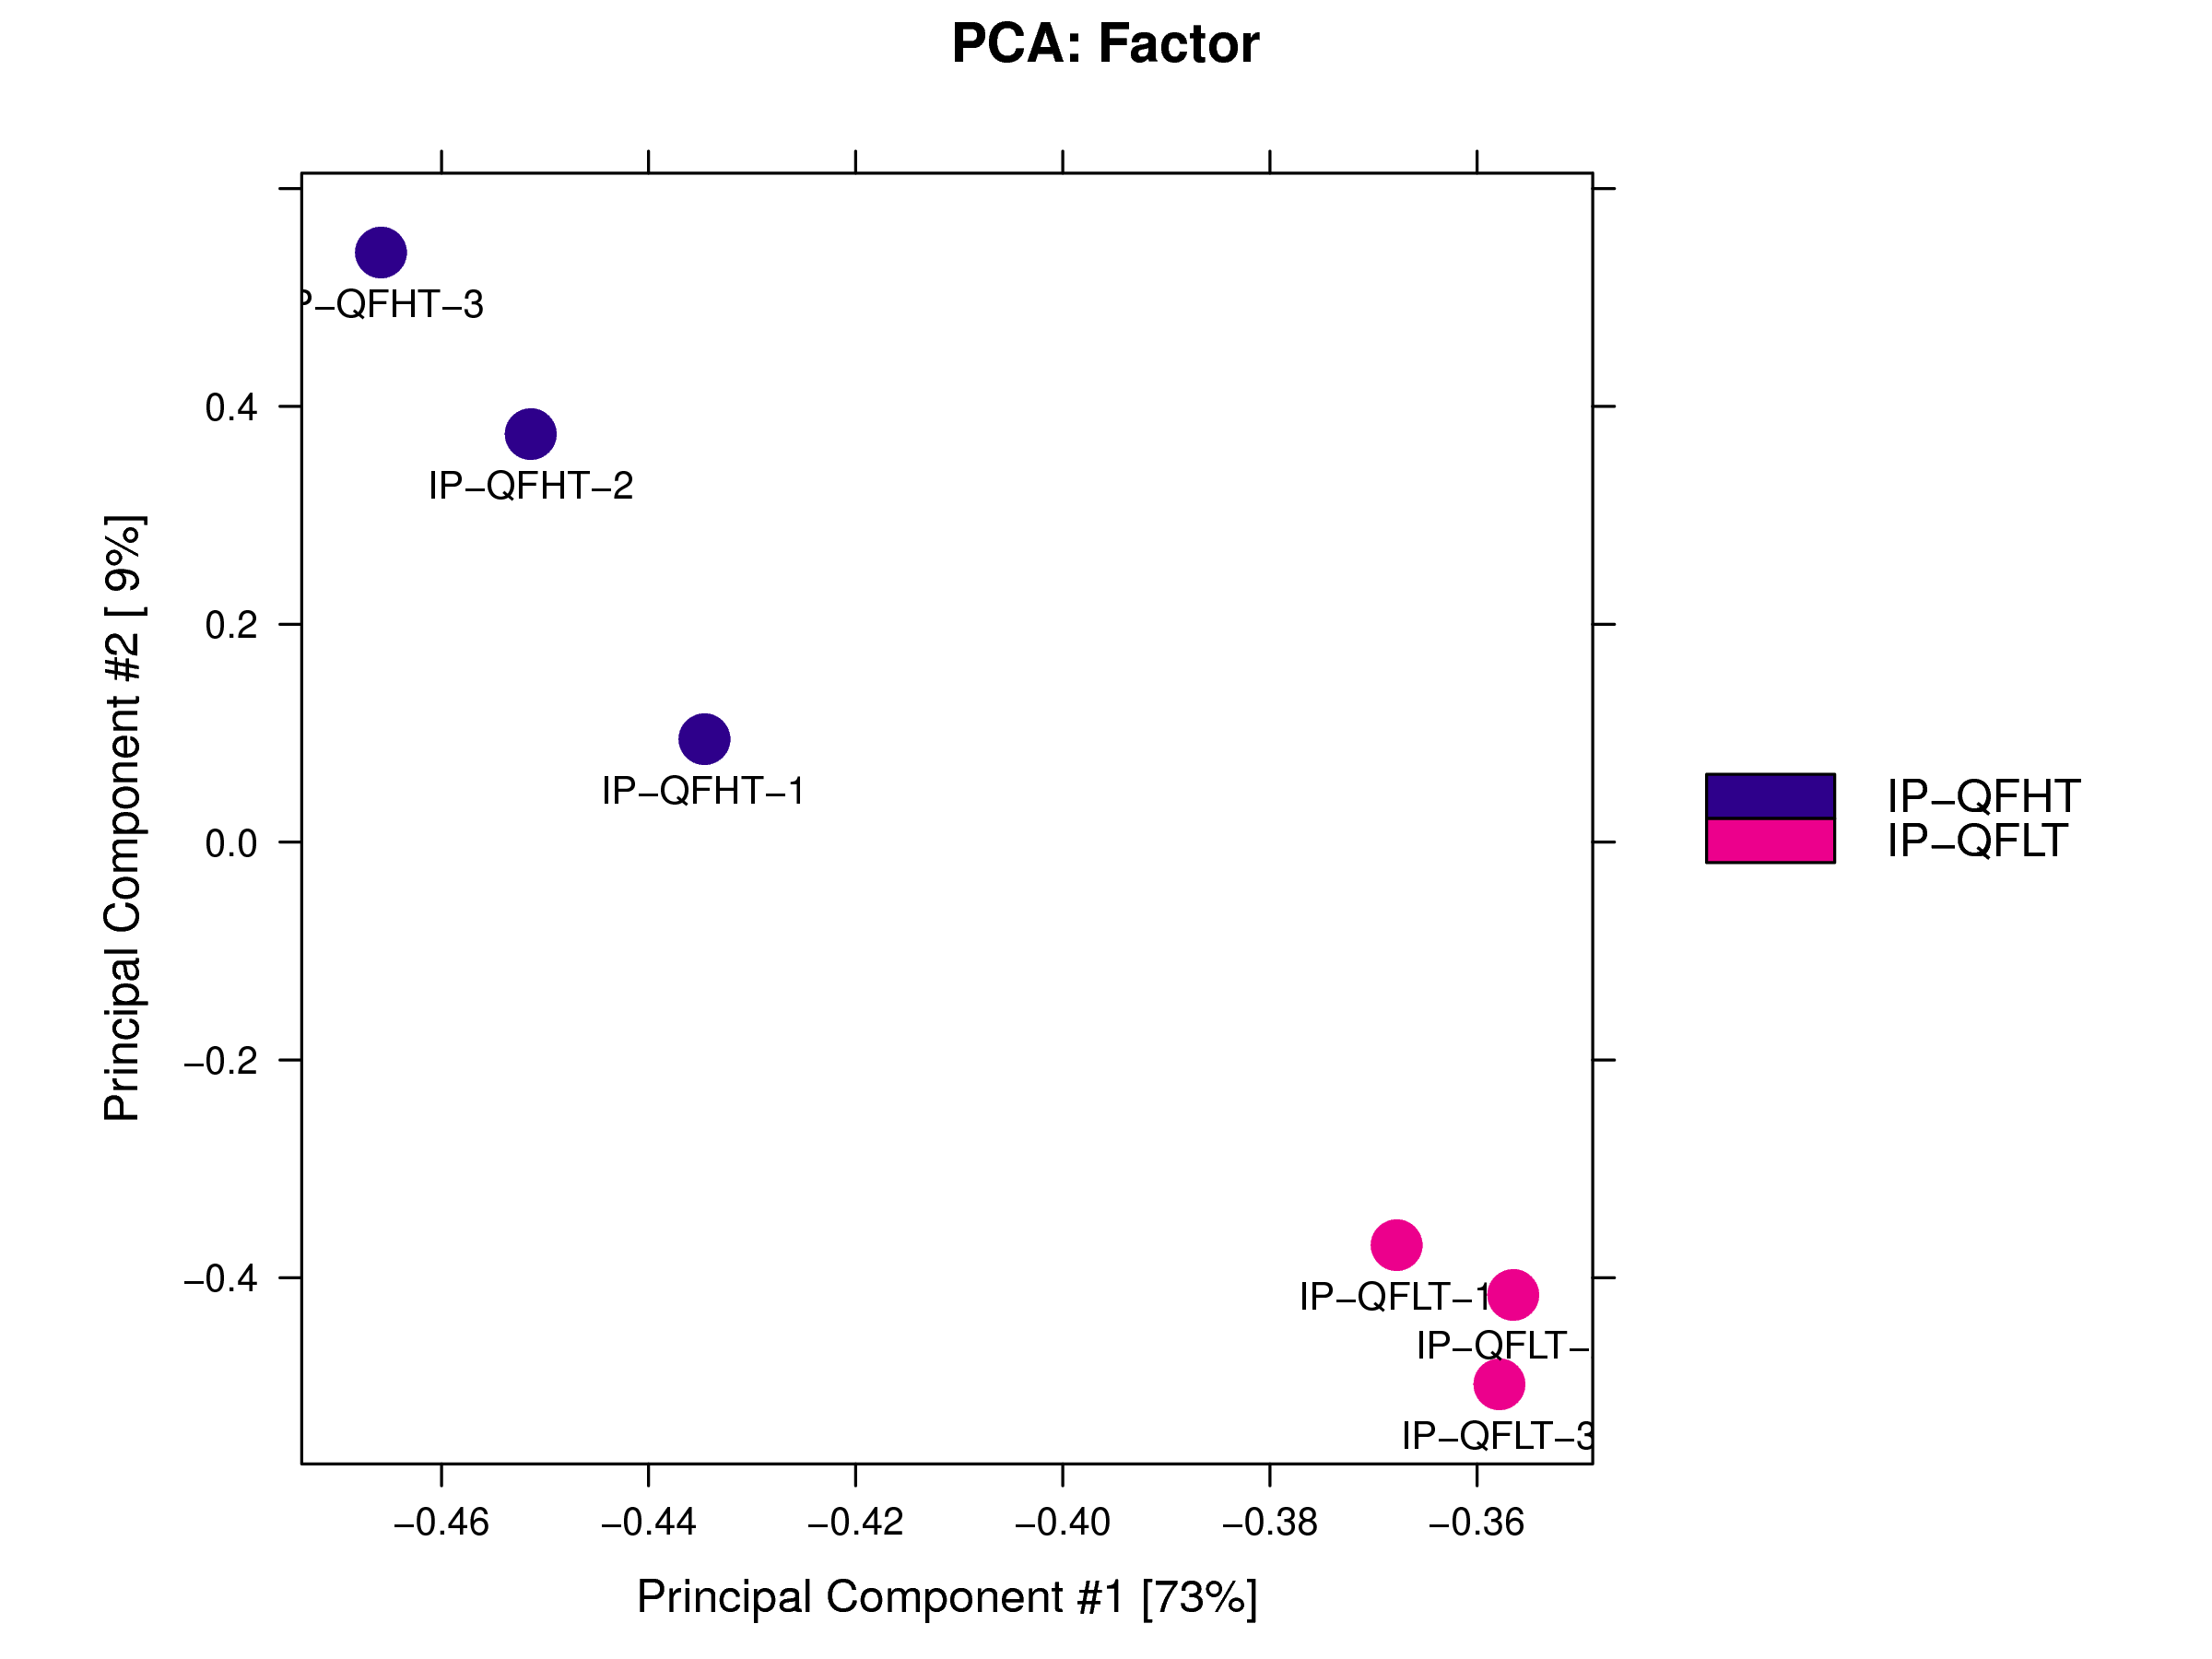


Figure S2. PCA analysis chart


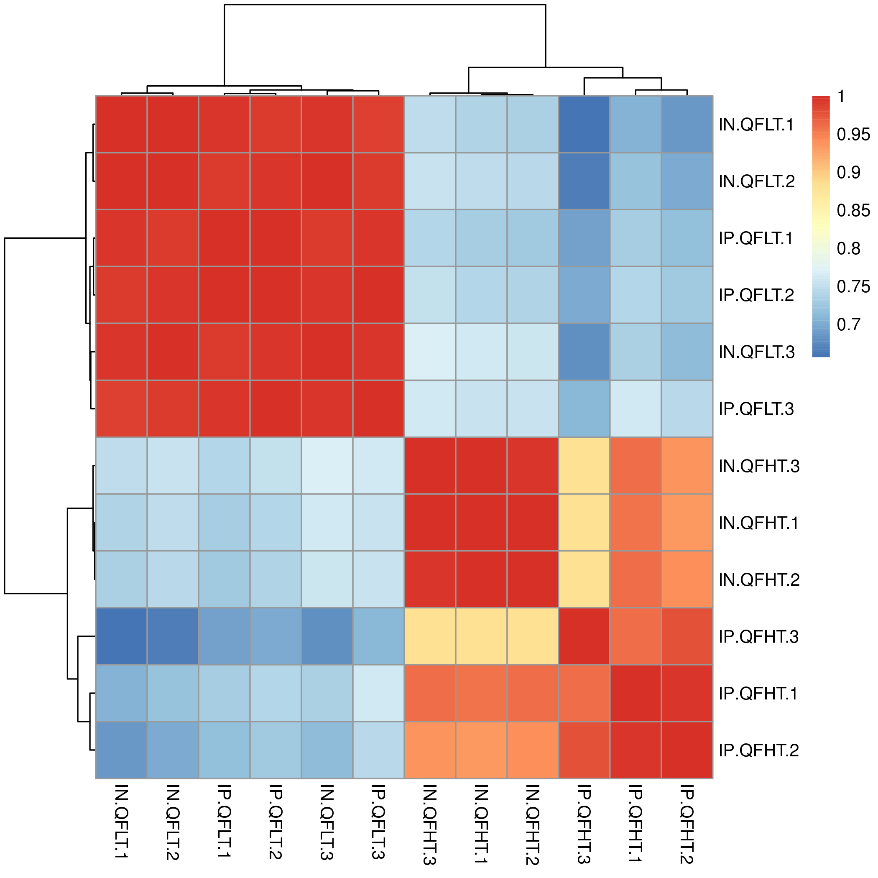


Figure S3. Correlation heatmap
