# Supplementary material for: Transcriptome-wide N6-methyladenosine methylome profiling of Bombyx mori reveals a potential mechanism of epigenetic regulation on diapause
Source: Research Square preprint supplement (doi:10.21203/rs.3.rs-1561012/v1), 2022-04-18
Supplement: Supplementary file 5 [file 6d883f64755535ab99d0c08e.docx]

Table S1. Reads filter information statistics table

| Sample | RawDatas | CleanData(%) | Adapter(%) | LowQuality(%) | polyA(%) | N(%) |
| --- | --- | --- | --- | --- | --- | --- |
| IN-QFHT-1 | 43404694 | 43363736 (99.91%) | 7578 (0.02%) | 33380 (0.08%) | 0 (0.00%) | 0 (0.00%) |
| IN-QFHT-2 | 50646698 | 50602292 (99.91%) | 7796 (0.02%) | 36610 (0.07%) | 0 (0.00%) | 0 (0.00%) |
| IN-QFHT-3 | 48924124 | 48877638 (99.90%) | 8500 (0.02%) | 37986 (0.08%) | 0 (0.00%) | 0 (0.00%) |
| IN-QFLT-1 | 41994762 | 41958472 (99.91%) | 8108 (0.02%) | 26544 (0.06%) | 0 (0.00%) | 1638 (0.00%) |
| IN-QFLT-2 | 38740502 | 38696008 (99.89%) | 7592 (0.02%) | 35372 (0.09%) | 0 (0.00%) | 1530 (0.00%) |
| IN-QFLT-3 | 46183628 | 46139390 (99.90%) | 7330 (0.02%) | 36908 (0.08%) | 0 (0.00%) | 0 (0.00%) |
| IP-QFHT-1 | 40460780 | 38689806 (95.62%) | 1611470 (3.98%) | 158960 (0.39%) | 0 (0.00%) | 544 (0.00%) |
| IP-QFHT-2 | 43201358 | 41794378 (96.74%) | 1261110 (2.92%) | 145276 (0.34%) | 0 (0.00%) | 594 (0.00%) |
| IP-QFHT-3 | 40304940 | 38918846 (96.56%) | 1265732 (3.14%) | 119714 (0.30%) | 0 (0.00%) | 648 (0.00%) |
| IP-QFLT-1 | 39829974 | 37897174 (95.15%) | 1766340 (4.43%) | 165988 (0.42%) | 0 (0.00%) | 472 (0.00%) |
| IP-QFLT-2 | 37550188 | 35769344 (95.26%) | 1625680 (4.33%) | 154650 (0.41%) | 0 (0.00%) | 514 (0.00%) |
| IP-QFLT-3 | 40465880 | 38679420 (95.59%) | 1647206 (4.07%) | 138710 (0.34%) | 0 (0.00%) | 544 (0.00%) |

Table S2. Comparison ribosome statistical table

| Sample | Total  _Reads | Unmapped  _Reads | Unique  _Mapped_Reads | Multiple  _Mapped_reads | Mappin  Ratio |
| --- | --- | --- | --- | --- | --- |
| IN-QFHT-1 | 43363736 | 42533170(98.08%) | 127722(0.29%) | 702844(1.62%) | 1.92% |
| IN-QFHT-2 | 50602292 | 49196998(97.22%) | 209625(0.41%) | 1195669(2.36%) | 2.78% |
| IN-QFHT-3 | 48877638 | 47612575(97.41%) | 183788(0.38%) | 1081275(2.21%) | 2.59% |
| IN-QFLT-1 | 41958472 | 41215960(98.23%) | 105819(0.25%) | 636693(1.52%) | 1.77% |
| IN-QFLT-2 | 38696008 | 37557338(97.06%) | 171300(0.44%) | 967370(2.50%) | 2.94% |
| IN-QFLT-3 | 46139390 | 43871861(95.09%) | 343711(0.74%) | 1923818(4.17%) | 4.91% |
| IP-QFHT-1 | 38689806 | 29566150(76.42%) | 1295802(3.35%) | 7827854(20.23%) | 23.58% |
| IP-QFHT-2 | 41794378 | 31602268(75.61%) | 1458602(3.49%) | 8733508(20.90%) | 24.39% |
| IP-QFHT-3 | 38918846 | 30823223(79.20%) | 1172540(3.01%) | 6923083(17.79%) | 20.80% |
| IP-QFLT-1 | 37897174 | 27388762(72.27%) | 1509862(3.98%) | 8998550(23.74%) | 27.73% |
| IP-QFLT-2 | 35769344 | 26329158(73.61%) | 1450642(4.06%) | 7989544(22.34%) | 26.39% |
| IP-QFLT-3 | 38679420 | 28008864(72.41%) | 1445720(3.74%) | 9224836(23.85%) | 27.59% |

Table S3. Reference statistics for comparison

| Sample | Total  _Reads | Unmapped  _Reads | Unique_Mapped  _Reads | Multiple_Mapped_  reads | Mapping_  Ratio |
| --- | --- | --- | --- | --- | --- |
| IN-QFHT-1 | 42567258 | 15064573(35.39%) | 25532155(59.98%) | 1970530(4.63%) | 64.61% |
| IN-QFHT-2 | 49257612 | 17379002(35.28%) | 29615551(60.12%) | 2263059(4.59%) | 64.72% |
| IN-QFHT-3 | 47654736 | 16866375(35.39%) | 28529424(59.87%) | 2258937(4.74%) | 64.61% |
| IN-QFLT-1 | 41239260 | 13721314(33.27%) | 25716636(62.36%) | 1801310(4.37%) | 66.73% |
| IN-QFLT-2 | 37624070 | 11868176(31.54%) | 24109532(64.08%) | 1646362(4.38%) | 68.46% |
| IN-QFLT-3 | 43969968 | 14068831(32.00%) | 27989816(63.66%) | 1911321(4.35%) | 68.00% |
| IP-QFHT-1 | 29687424 | 11136264(37.51%) | 16263713(54.78%) | 2287447(7.71%) | 62.49% |
| IP-QFHT-2 | 31744786 | 11277107(35.52%) | 17714567(55.80%) | 2753112(8.67%) | 64.48% |
| IP-QFHT-3 | 30931178 | 10772171(34.83%) | 16913560(54.68%) | 3245447(10.49%) | 65.17% |
| IP-QFLT-1 | 27479846 | 9385713(34.15%) | 15999622(58.22%) | 2094511(7.62%) | 65.85% |
| IP-QFLT-2 | 26469354 | 8529654(32.22%) | 16008967(60.48%) | 1930733(7.29%) | 67.78% |
| IP-QFLT-3 | 28167684 | 9174595(32.57%) | 17098074(60.70%) | 1895015(6.73%) | 67.43% |

Table S4. Statistical table of sample peak numbers

| Sample | Peak number | Total length | Average length | Total tags | Average tags | FRiP(%) | Genome rate(%) |
| --- | --- | --- | --- | --- | --- | --- | --- |
| IP-QFHT-1 | 3552 | 589780 | 166 | 1476187 | 415 | 7.957 | 0.134 |
| IP-QFHT-2 | 3828 | 645375 | 168 | 1918089 | 501 | 9.371 | 0.146 |
| IP-QFHT-3 | 4306 | 691743 | 160 | 2268717 | 526 | 11.254 | 0.157 |
| IP-QFLT-1 | 4957 | 845348 | 170 | 2462919 | 496 | 13.612 | 0.191 |
| IP-QFLT-2 | 5197 | 894450 | 172 | 1641695 | 315 | 9.151 | 0.203 |
| IP-QFLT-3 | 4211 | 726682 | 172 | 2128585 | 505 | 11.207 | 0.165 |

Table S5. Statistical table of peak number in each group

| Sample | Peak number | Total length | Average length | Genome rate (%) |
| --- | --- | --- | --- | --- |
| IP-QFHT | 2663 | 591342 | 222 | 0.134 |
| IP-QFLT | 3561 | 814363 | 228 | 0.184 |

Table S6. Differential gene validation by MeRIP-qPCR

| GeneID | Description | log2(FC) |
| --- | --- | --- |
| ncbi_101745361 | putative phosphatidate phosphatase | 2.242581 |
| ncbi_101740254 | glycerol-3-phosphate acyltransferase 1, mitochondrial | 3.113782 |
| ncbi_100101205 | mevalonate kinase | 2.765896 |
| LOC101743496 | glutamine--fructose-6-phosphate aminotransferase [isomerizing] 1 | 1.926547 |
| LOC101745162 | potassium/sodium hyperpolarization-activated cyclic nucleotide-gated channel 2 | 3.191036 |
| VG | vitellogenin precursor | 1.660167 |
| PLCb1 | phospholipase C beta 1 | 2.76887 |
| LOC101743158 | division abnormally delayed protein | 1.723044 |
| LOC101738592 | transient receptor potential cation channel trpm | 2.482408 |
| LOC101741421 | inositol 1,4,5-trisphosphate receptor | 2.93713 |
