# Supplementary material for: Transcriptome-wide N6-methyladenosine methylome profiling of Bombyx mori reveals a potential mechanism of epigenetic regulation on diapause
Source: Research Square preprint supplement (doi:10.21203/rs.3.rs-1561012/v1), 2022-04-18

## 目录

|                                |   |
|--------------------------------|---|
| IP-QFHT-1.peaks.reads_cov..... | 1 |
| IP-QFHT-2.peaks.reads_cov..... | 2 |
| IP-QFHT-3.peaks.reads_cov..... | 3 |
| IP-QFLT-1.peaks.reads_cov..... | 4 |
| IP-QFLT-2.peaks.reads_cov..... | 5 |
| IP-QFLT-3.peaks.reads_cov..... | 6 |

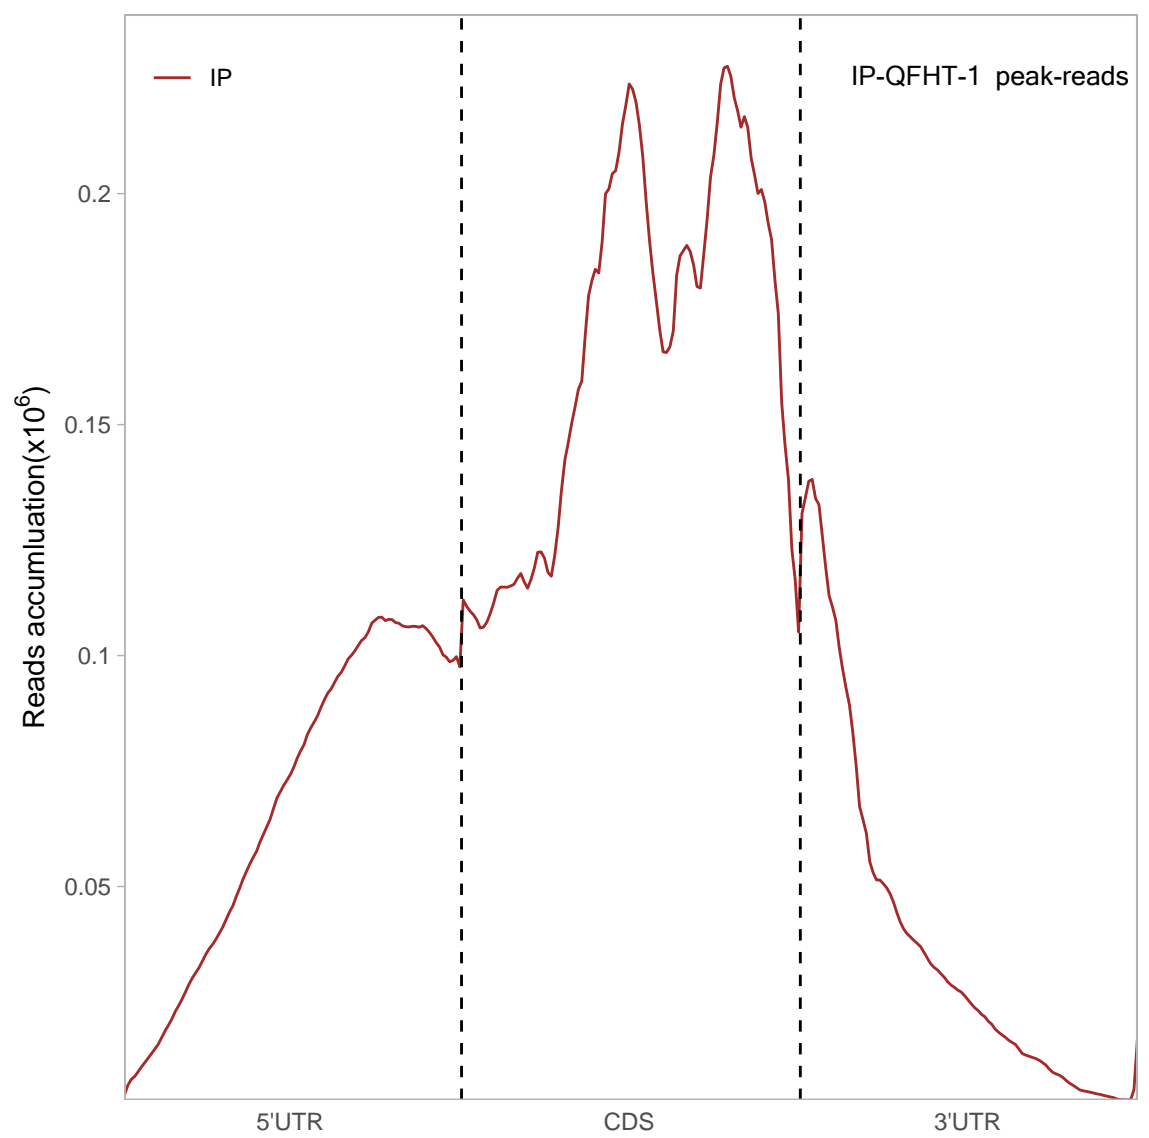

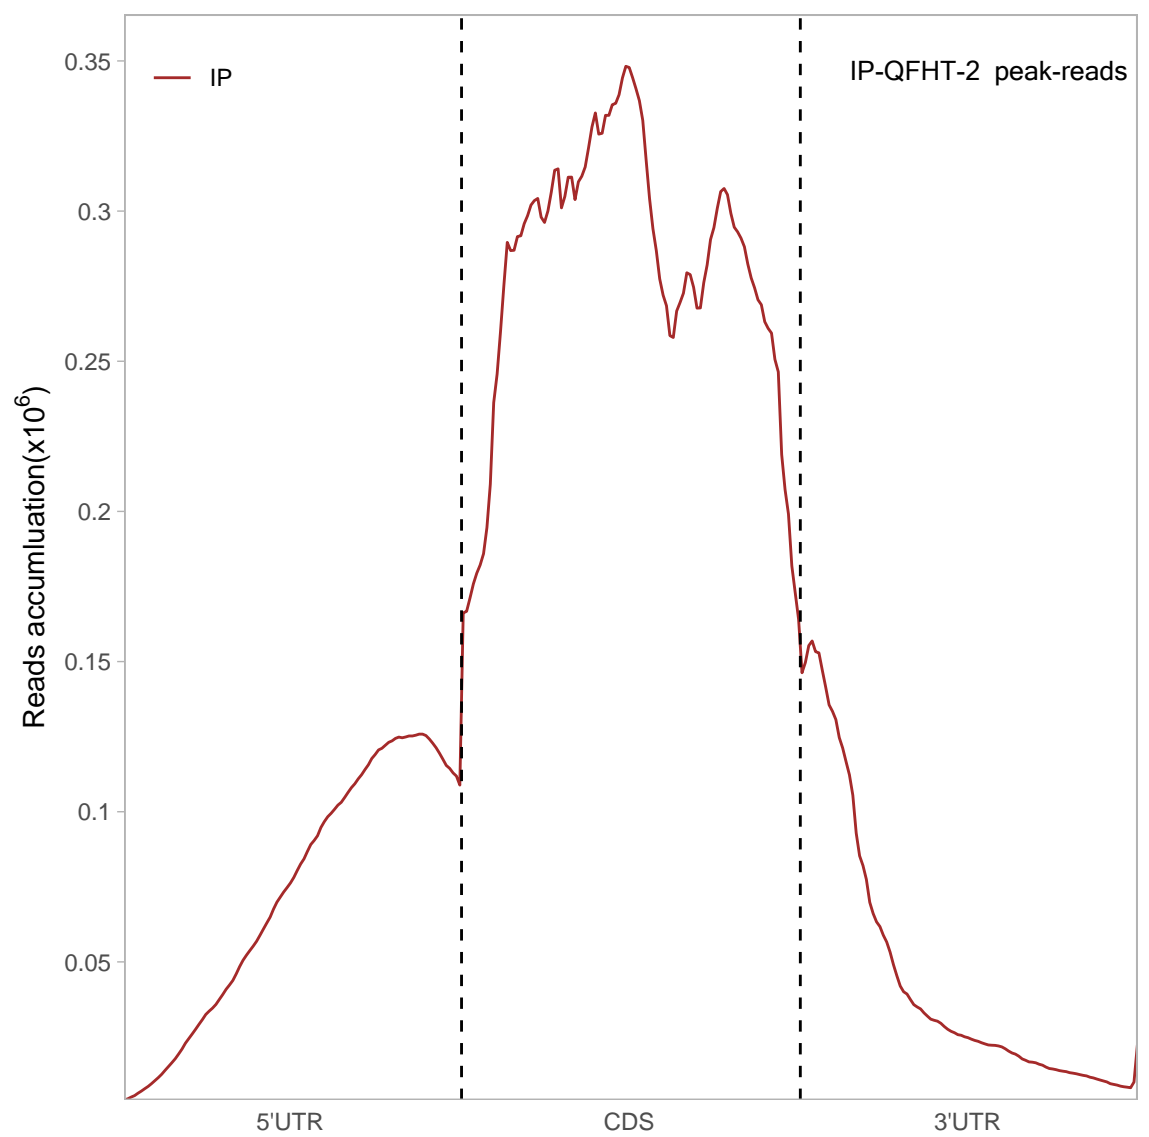

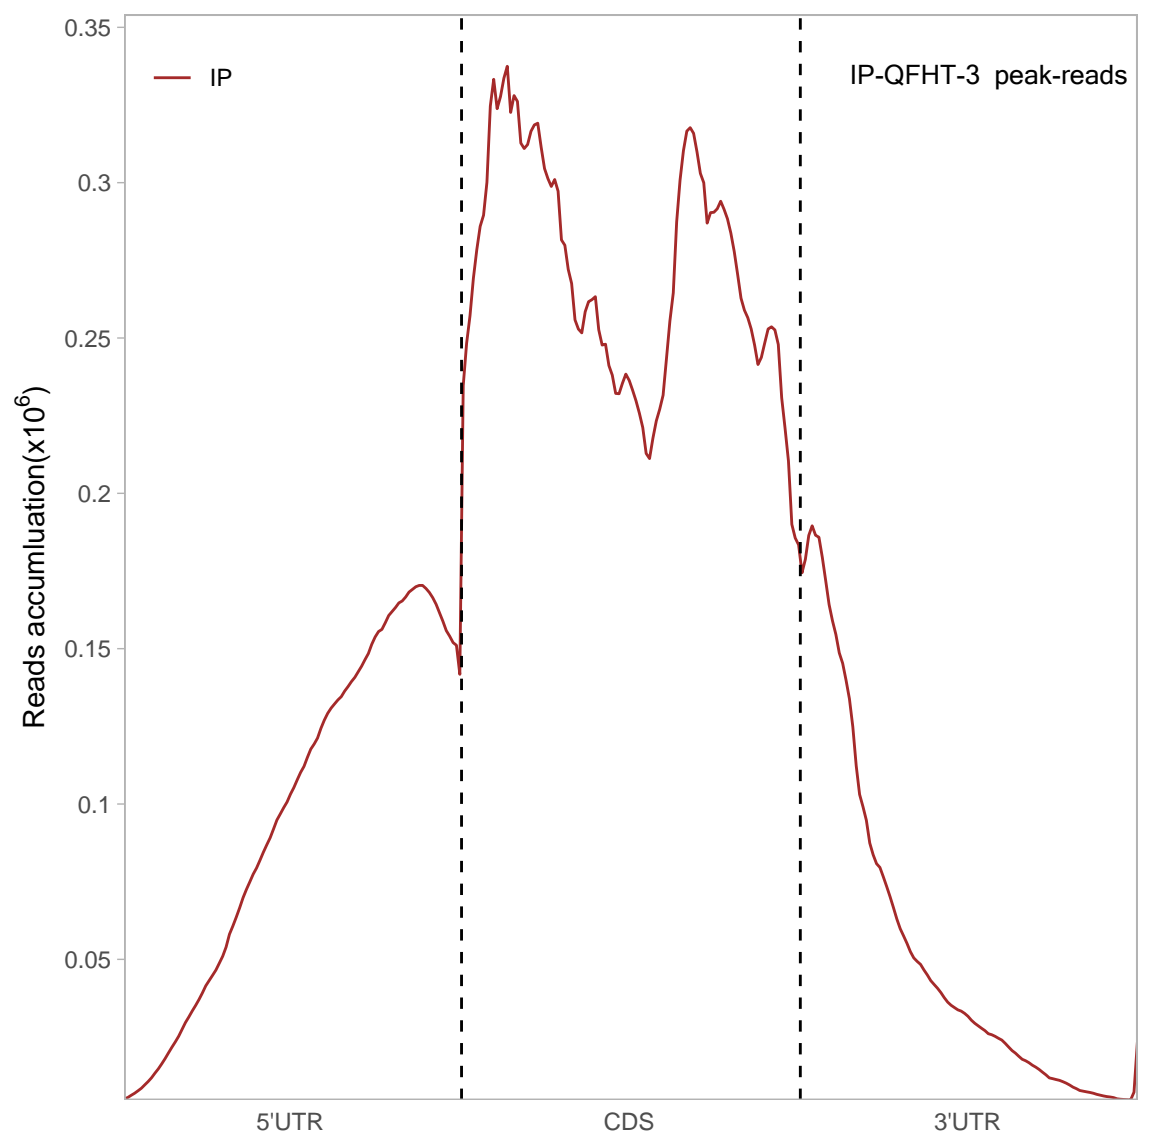

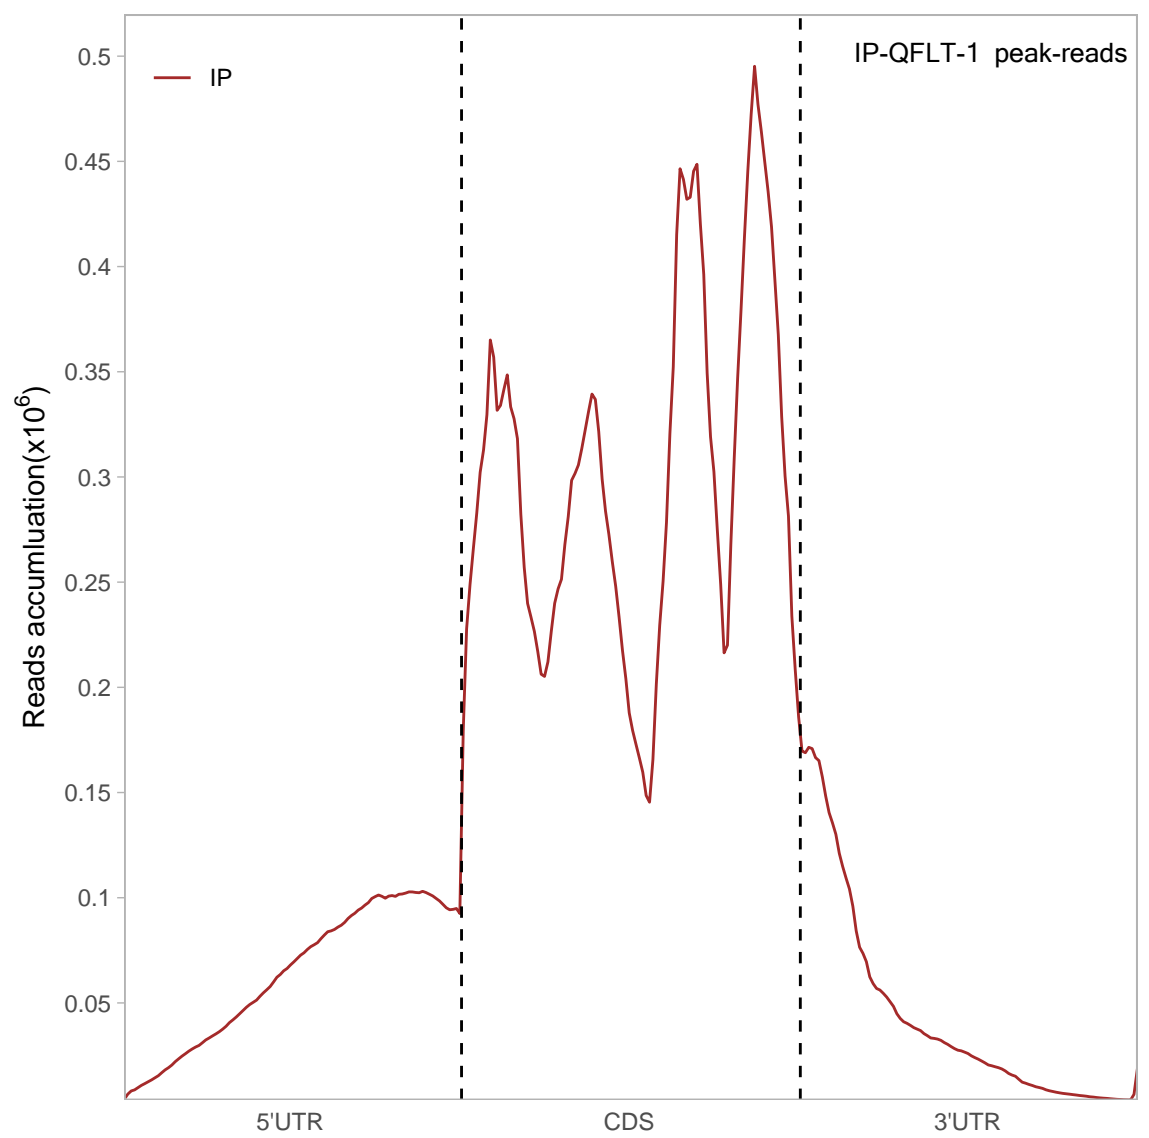

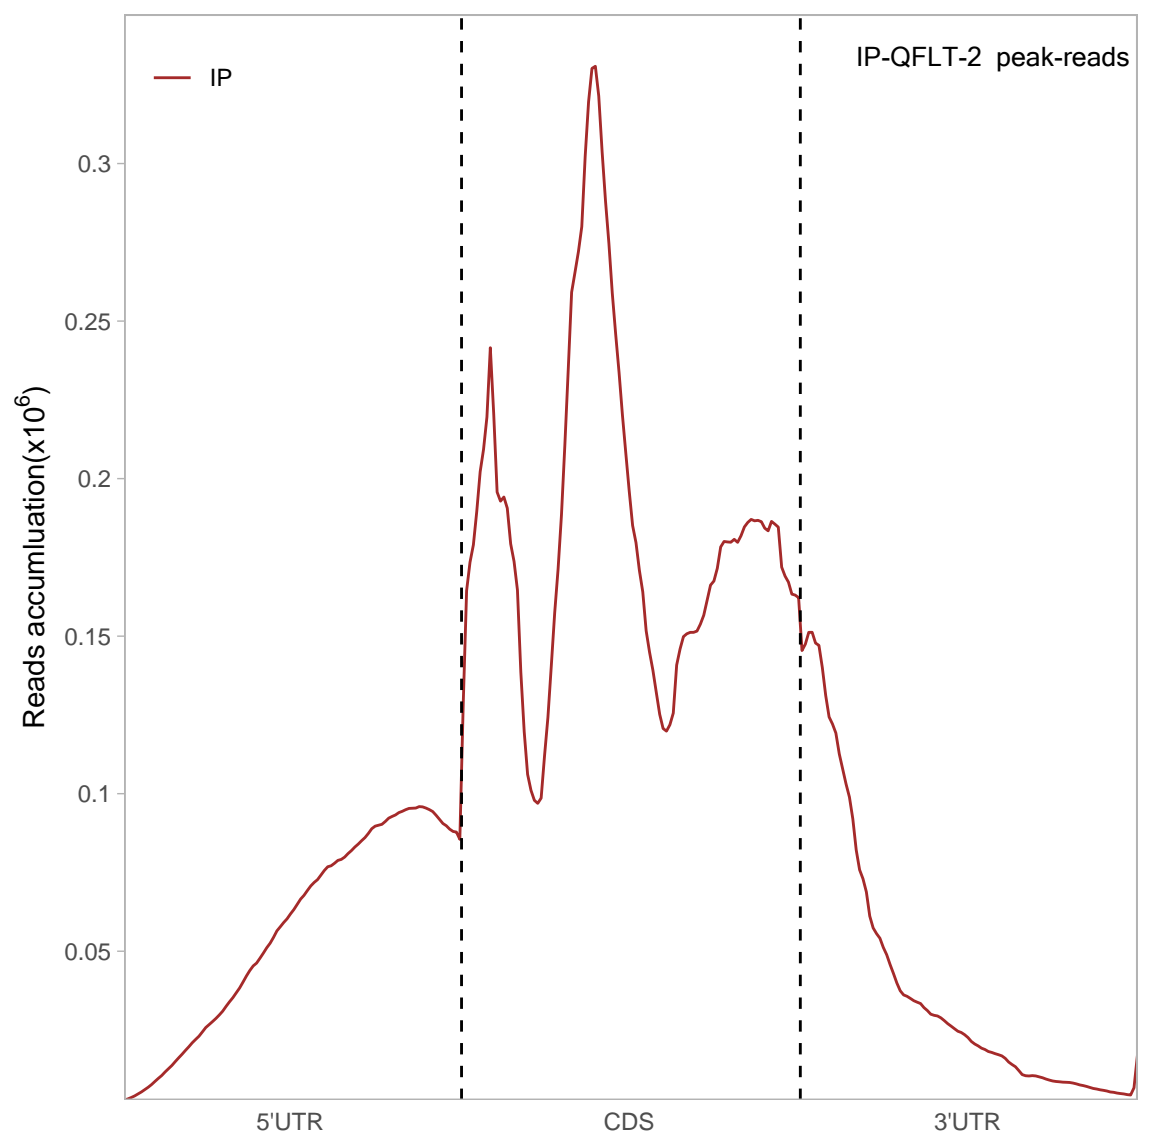

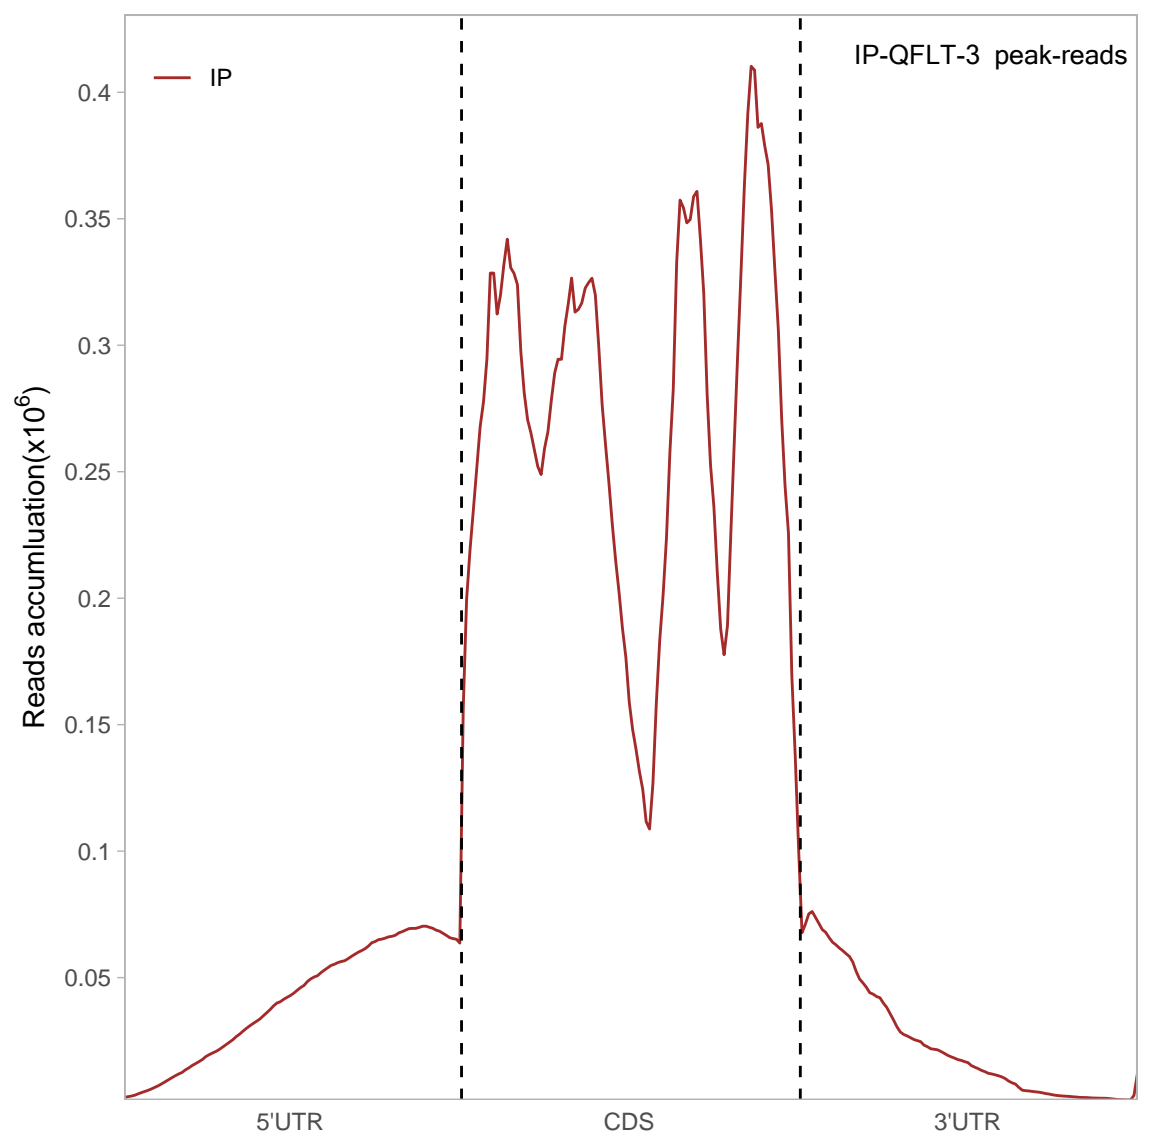

Supplement: Supplementary file 8 [file 8a6304a870bf23bbffbd9a55.pdf]
